# Supplementary material
Source: Research Square preprint supplement (doi:10.21203/rs.3.rs-10206306/v1)
Supplement: Supplementary file 1 [file 0a095527fac87fb1bd38169a.xlsx]

## Sheet: Fig1.
OFT
Time spend in the center(s)				center entries				Total Distance travelled (m)
sham	CLP	CLP+DEX		sham	CLP	CLP+DEX		sham	CLP	CLP+DEX
7.9	5.2	13.1		4	6	8		17.664	18.148	16.176
7.8	3	10.3		8	2	4		18.184	11.146	16.031
14.7	8.7	16.1		10	6	3		24.045	21.648	6.942
3.5	7.8	16.7		4	8	6		19.868	16.245	17.847
18.7	3.6	9.8		11	4	5		21.016	10.432	13.725
11.2	2.4	10.2		10	3	2		21.424	14.997	6.394
3.3	2	8.4		1	1	12		14.665	9.012	19.672
17.6	4.8	12.9		9	0	11		15.103	21.148	19.764
14	2.9	8.9		6	5	5		14.163	13.484	20.169
18.8	2.1	14.8		6	3	12		13.415	8.292	18.261
13.6	1.4	7.8		7	1	9		19.075	13.53	16.534
6.5	3.2	9.6		5	3	8		12.672	13.246	17.931
	Fig1.D				Fig1.E				Fig1.F
YM
The ratio of entries in novel arm(%)				Time spent in novel arm (s)				Total Distance travelled (m)
sham	CLP	CLP+DEX		sham	CLP	CLP+DEX		shanm	CLP	CLP+DEX
42.86	28.57	48.57		130.9	101.8	132.8		12.866	11.225	10.775
33.33	33.33	38.89		117.2	44.4	97.2		12.298	10.854	11.988
51.86	31.57	40		125.4	88.2	83.2		14.01	13.501	8.887
43.9	28	33.33		154.2	83.5	71.9		8.449	9.124	12.441
40.74	34.44	30.43		127.4	79	148.4		11.003	10.338	11.587
34.38	18.67	34.48		102.8	62	118.4		10.752	11.995	9.502
35.48	26.09	38		102.2	87	132.7		9.827	9.502	10.441
43.75	32.26	50		96.2	98.8	101.5		8.043	8.561	13.112
32.61	35.71	42.86		123.7	84.1	116.8		10.106	9.843	12.002
41.18	28.1	47.06		102.2	102	141.8		8.773	11.44	8.998
42.86	36	36.84		153.8	91.6	122.8		11.999	6.813	11.501
40.91	33.75	39.13		133.5	74.2	113.9		12.704	9.215	10.125
	Fig1.G				Fig1.H				Fig1.I
FC
FreezingTotal%				FreezingTotal%
sham	CLP	CLP+DEX		sham	CLP	CLP+DEX
75.62	55.93	86.55		73.72	52.62	95.7
95.81	49.26	63.54		85.42	76.65	85.47
72.35	47.99	92.14		93.37	61.4	95.67
87.23	54.23	71.72		66.47	25.35	81.06
67.34	44.7	79.66		35.01	74.45	59.95
75.17	47.28	79.04		79.91	31.03	75.82
90.42	49.28	63.53		82.82	22.21	67.89
77.36	46.21	75.56		95.57	65.85	80.52
82.45	52.19	64.47		75.77	71.43	77.95
74.58	60.06	65.62		48.25	38.3	71.08
81.76	63.67	68.52		83.17	45.06	77.01
91.33	41.91	59.52		64.37	66.61	82.03
	Fig1.J				Fig1.K

## Sheet: Fig2.
	Mean Duration(minutes)
	sham								CLP								CLP+DEX
WAKE	281.267	286.933	300.667	252.133	288.867	256.533	270.2	261.8	376.733	394.733	406.8	400.067	397.133	364.6	418.467	396.6	333.133	371.867	236.133	364.933	213.6	248.667	321	348.333
NREM	365.067	377.2	354	405	388.333	422.4	383.2	390.133	311	299.467	285.6	287.067	288.667	308.333	270.733	287.2	376.733	325.933	466.8	331.133	487.467	447.067	376.733	345.067
REM	73.6667	55.8667	65.3333	62.8667	42.8	41.0667	66.6	68.0667	32.2667	25.8	27.6	32.8667	34.2	47.0667	30.8	36.2	10.1333	22.2	17.0667	23.9333	18.9333	24.2667	22.2667	26.6
								Fig.2C
	Wake bouts count
ZT(h)	sham									CLP									CLP+DEX
2	24	30	31	27	21	25	20			76	68	64	62	69	59	131	60		36	28	38	33	35	25	35	27	39
4	53	20	28	27	18	33	34			62	51	68	57	50	49	91	48		40	31	46	20	37	35	44	45	35
6	27	29	30	28	23	19	24			69	52	51	57	62	60	92	55		43	42	43	36	28	47	37	44	35
8	31	22	31	23	16	30	32			67	58	66	56	81	46	83	47		48	53	76	41	65	48	67	42	44
10	34	28	29	22	19	28	30			50	64	78	46	72	56	94	63		46	48	54	59	52	47	47	44	32
12	32	27	32	33	24	35	27			77	44	54	55	53	53	80	53		39	53	48	42	25	55	39	46	48
								Fig.2D
	NREM bouts count
ZT(h)	sham									CLP									CLP+DEX
2	47	51	71	69	43	60	59			25	10	31	59	38	49	13	17		47	49	38	45	35	75	43	49	49
4	64	49	69	66	65	48	48			60	22	40	21	40	62	13	25		79	72	46	20	67	35	57	44	66
6	52	56	51	57	62	61	55			29	30	33	55	18	37	25	30		64	45	73	37	76	67	67	44	68
8	43	57	67	60	53	46	47			34	23	37	39	22	11	32	26		70	37	66	41	66	48	62	46	54
10	54	65	77	49	62	57	63			38	30	34	37	44	51	10	12		67	48	58	41	56	37	79	45	63
12	47	44	52	57	59	54	53			34	32	32	21	9	24	10	8		51	53	57	45	59	59	59	48	78
								Fig.2E
	REM bouts count
ZT(h)	sham									CLP									CLP+DEX
2	7	9	10	28	28	30	8			2	13	15	7	18	4	2	2		0	7	0	0	0	0	3	4	6
4	18	11	23	13	27	38	11			7	9	14	12	12	5	4	5		0	3	0	0	0	0	10	4	9
6	8	7	11	14	17	23	23			3	9	10	5	0	7	2	2		0	13	0	0	6	0	7	5	8
8	12	17	14	34	11	19	21			11	5	6	7	13	6	6	6		9	11	5	2	10	8	5	9	6
10	11	12	21	19	28	26	12			9	11	7	10	17	10	1	7		11	13	12	7	8	6	7	9	5
12	15	17	18	20	13	19	17			6	4	9	10	13	4	1	6		12	5	11	17	13	14	6	10	3
								Fig.2F
	wake bouts duration
	sham									CLP									CLP+DEX
2	336.5	418.556	236.161	204.63	185.095	286.84	412.2			485.429	477.26	448.597	429.476	441.569	437.864	418.374	455.263		298.696	326.583	314	358.267	285.314	437.84	340.791	347.333	309.837
4	311.132	373.4	320.286	440.857	233.556	238.606	252.857			429.476	459.417	433.056	450.373	566.889	471.984	425.741	459.282		299.2	307.577	395.913	351.4	327.552	412.4	322.074	344.222	297.015
6	190.259	308.379	279.533	291	679	451	278.667			463.349	436.643	445.717	451.159	624.817	441.08	427.385	457.493		294.762	335.714	330.667	323.556	291.753	300.269	307.612	326.545	300.831
8	244.419	312.818	292.935	293.783	243.25	461.4	289			454.213	452.969	440.681	429.608	427.189	456.499	436.952	472.151		283	367.212	287.651	315.171	295.806	332.917	313.032	336.286	303.111
10	265.353	239.857	284.586	209	257.737	249.714	436.6			459.692	430.822	425.981	453.837	419.448	447.258	423.613	430.444		279.091	319.25	297.407	339.231	285.154	358.333	286.883	333.091	289.419
12	280.25	236.481	247.5	271.308	374	352.6	659			472.405	779.478	457.823	456.245	423.855	451.292	433.677	444.475		329.179	314.302	305.667	307.048	300.4	293.564	313.593	325.913	292.308
								Fig.2G
	NREM bouts duration
	sham									clp									CLP+DEX
2	105.6	244.8	86.1695	84.8235	81.0435	194.353	123.692			41.3617	37.2549	39.7746	65.5072	89.1163	64.8667	21.0186	46.2373		115.83	67.8367	141.368	78.7556	178.4	149.44	79.4419	57.3878	92.8163
4	82.6667	156.727	121.524	157.2	97.6129	199.68	208			63.4375	61.8776	46.1449	46.6667	19.04	45.5	26.3759	61		108.101	119.944	163.438	91.8776	146.145	165.667	144.14	129.545	157.758
6	102.759	154.133	92	94.4444	110.919	211.2	177.12			55.9231	62.2143	62.0392	56.4211	8	53.7049	29.9636	48.5091		160.375	156.978	98.8767	160.432	141.947	145.313	135.761	159.273	140.529
8	103.294	160.522	86.7692	191.455	114.182	172.923	145.25			73.3023	48.7018	47.7612	62.8667	29.4182	69.2174	23.1786	48		124.114	85.5135	80.4242	115.902	91.6364	79.3333	154.387	110.348	121.704
10	92.1053	143.867	156.757	108.182	115.216	199.333	222			48.8148	61.9077	49.5584	68.0816	38.1818	54.5263	29.4426	62.6667		123.104	116.083	123.034	131.902	136.571	119.459	99.443	122.133	110.349
12	137.176	128.25	115.238	63.5556	102.667	184	154.133			50.8085	45.6364	44.4615	42.0351	85.6271	55.8519	28.7059	64.9057		110.667	115.698	119.789	130.844	113.966	111.797	103.186	113.167	95.1795
								Fig.2H
	REM bouts duration
	sham									CLP									CLP+DEX
2	63.2	58.6667	63.2	49.234	21.6667	40.5	47.3333			8	17.5385	38.9333	8.57143	18.5263	40	7.17647	30		0	25	0	0	0	0	36	25	26
4	52.2222	52.3636	52.8696	49.2308	63.8519	71.8947	48			42.2857	32.8889	52	10	28.3333	32	7.45098	38		0	24	0	0	0	0	24.8	30	16.4444
6	58.5	70.8571	73.8182	83.6364	84.5714	62.7826	39.3333			42.6667	52.4444	36	36	0	64	6.46154	34		0	21.5385	0	0	15.3333	0	18.8571	42.8	42
8	64.3333	89.7143	66	81.6364	43.2727	73.2018	62.2857			58.1818	32.8	26	45.4286	8.46512	36	6.23256	43.3333		17.7778	35.2727	20	20	12.4	13	25.2	32	32
10	79.6364	59.3333	42.6667	65.5789	78.2857	52.6154	74			38.2222	41.0909	65.7143	47.2	9.19298	38	7.91489	66.8571		30.1818	26.7692	16	27.4286	42.5	34.6667	39.4286	29.7778	36.4
12	69.8667	44.9412	64.5	71.6	101.333	87.6	47.3333			18.6667	45	59.5556	39.2	18.4615	32	8	75.3333		32.9091	36	17.5556	56.4706	36	50.2	29.3333	41.6	37.3333
								Fig.2I
	PSD (μV²/Hz)
Frequency（Hz）	control					saline					DEX
0	1.44826	1.33624	1.09226	0.920864	1.1026	0.564696	0.92172	0.781244	0.946341	1.04777	1.25342	1.7127	1.33041	2.23539	1.7402
0.1	1.61777	0.673141	1.26177	0.476009	0.586384	0.57086	0.481909	0.442878	0.645643	0.545122	0.795765	0.955243	0.699003	2.18223	2.16768
0.2	4.43141	0.8692	4.07541	0.617304	0.945184	1.85912	0.63778	0.754456	1.32841	0.817387	1.28587	1.58509	1.11781	6.81906	7.16748
0.3	9.45079	4.85996	9.09479	3.22349	4.74324	5.5802	3.26072	3.35088	4.98102	4.31029	5.62763	7.29874	5.8317	20.879	14.3669
0.4	21.1781	17.4358	20.8221	10.5443	14.5122	12.0313	10.5843	9.47677	14.9805	13.404	17.1938	23.1967	19.6727	49.8388	26.9647
0.5	41.9496	42.4332	41.5936	24.8105	32.7427	21.6822	24.643	20.2729	35.9123	29.8705	38.2504	53.611	48.7933	97.7651	49.4932
0.6	73.1618	82.0805	72.8058	47.0013	61.8721	34.006	46.7889	35.8018	59.7604	56.8401	77.0619	104.613	90.8877	165.753	82.2121
0.7	113.155	133.653	112.799	77.0746	91.4152	44.1963	74.0676	53.7823	85.0892	92.2973	127.88	178.061	135.606	253.433	127.417
0.8	154.025	176.759	153.669	110.642	119.942	56.3289	107.622	74.3363	113.093	121.605	171.09	276.854	185.083	319.095	181.247
0.9	197.065	227.362	196.709	143.375	146.926	68.3481	137.333	93.5341	136.779	151.037	214.122	343.721	230.632	360.082	232.866
1	231.763	263.792	231.407	169.536	171.123	79.3082	156.551	109.831	155.814	181.18	248.392	367.278	263.021	393.866	273.351
1.1	257.477	283.051	257.121	188.169	188.681	88.9784	174.274	126.562	177.173	197.115	269.28	384.503	281.493	412.557	305.091
1.2	279.487	277.979	261.131	202.16	195.97	93.674	182.265	138.786	186.098	210.74	287.774	388.27	294.948	410.526	338.505
1.3	294.922	278.944	262.566	210.05	206.373	93.2127	191.709	146.672	188.886	219.667	297.757	395.324	302.271	390.698	351.261
1.4	282.514	274.129	263.158	221.658	217.678	95.3412	200.543	153.37	190.937	229.701	292.799	392.08	311.671	390.446	338.396
1.5	267.665	277.822	263.309	222.632	224.791	98.3126	212.539	161.379	191.014	236.541	299.901	373.348	303.701	377.343	332.878
1.6	275.208	285.266	263.852	234.486	228.579	101.234	223.66	171.686	196.858	235.161	299.354	366.698	285.659	360.365	335.493
1.7	277.202	275.187	264.171	254.284	228.792	103.756	229.808	180.389	201.273	233.823	282.317	364.016	284.48	361.603	333.686
1.8	276.937	271.664	264.87	262.614	235.548	106.572	235.887	184.184	209.905	232.196	269.667	368.439	274.84	353.346	330.968
1.9	277.1	275.026	264.513	267.765	238.892	109.721	241.998	193.096	207.85	229.144	275.869	371.675	263.986	348.01	338.427
2	273.994	273.051	263.476	261.38	236.415	114.32	246.167	203.002	209.093	232.059	284.411	363.846	257.191	346.412	349.669
2.1	284.663	273.99	259.671	257.274	235.456	117.343	242.564	208.733	215.309	227.128	288.071	355.631	254.377	341.644	346.79
2.2	292.064	269.836	259.572	256.167	237.921	121.367	235.483	214.45	224.683	227.929	293.257	343.508	246.754	336.116	338.344
2.3	292.9	266.988	257.807	250.329	241.11	128.038	229.915	221.056	227.364	224.615	297.796	341.284	240.77	321.646	341.818
2.4	293.277	262.138	256.578	237.646	239.848	128.602	222.011	219.008	229.561	216.478	297.034	346.126	237.335	325.497	339.571
2.5	294.283	256.307	255.12	227.444	238.709	128.062	216.579	219.886	225.585	212.96	276.643	336.734	239.6	319.786	343.461
2.6	300.726	237.353	254.113	220.686	239.938	129.167	213.77	225.667	222.495	209.72	262.053	335.871	229.538	309.533	346.354
2.7	297.372	220.43	253.244	217.467	240.181	129.679	205.688	226.168	224.897	206.48	246.912	337.444	228.884	310.048	339.357
2.8	294.586	219.944	250.131	211.301	241.794	128.011	200.935	222.671	225.321	204.762	233.808	331.991	226.846	297.582	333.288
2.9	298.333	210.872	249.208	212.135	242.017	124.587	200.223	220.593	226.657	210.6	219.416	328.455	216.679	287.507	329.309
3	289.978	199.519	248.177	207.247	241.065	122.851	198.061	217.547	227.814	208.979	206.523	325.794	202.706	284.208	318.089
3.1	290.4	194.502	246.626	196.903	239.795	120.537	196.32	214.245	229.89	201.33	196.735	311.032	192.741	283.651	305.19
3.2	288.114	189.27	245.802	195.77	233.155	119.901	192.615	212.837	231.169	197.917	186.665	297.314	186.715	276.143	300.485
3.3	282.47	185.166	244.847	193.537	231.508	118.86	186.9	201.172	226.898	196.453	180.285	290.823	179.532	267.025	295.797
3.4	280.834	181.377	243.707	189.522	233.936	117.599	182.171	196.417	220.871	194.961	175.311	290.97	176.077	268.593	288.571
3.5	278.824	178.91	242.802	185.057	233.435	117.927	178.886	190.202	220.964	190.259	168.256	273.043	169.711	269.06	285.003
3.6	268.119	175.367	242.537	185.06	232.133	118.109	182.919	185.679	215.506	186.682	162.91	267.967	161.149	252.443	280.293
3.7	264.888	171.551	242.518	180.782	229.082	116.741	182.48	182.868	206.942	187.189	155.662	263.681	160.519	245.163	266.092
3.8	260.93	166.297	241.882	179.369	225.991	114.911	181.147	181.323	200.254	185.967	153.337	252.173	158.131	239.593	259.411
3.9	253.643	162.368	241.606	174.592	226.859	113.077	175.244	177.937	198.784	179.11	152.249	244.113	153.04	235.188	252.823
4	251.06	163.407	240.981	172.813	222.267	111.506	171.567	171.143	197.775	176.261	149.229	234.429	154.139	224.291	248.154
4.1	244.258	164.078	239.902	171.09	215.596	110.344	174.654	168.778	191.9	176.4	147.819	226.356	152.552	214.178	243.312
4.2	235.851	162.311	235.495	162.928	212.089	108.808	175.678	168.273	190.312	173.86	148.06	215.017	146.823	209.659	238.159
4.3	228.227	159.462	227.871	163.579	214.067	108.611	172.065	164.074	187.417	169.246	143.443	210.55	145.007	202.81	229.789
4.4	226.196	156.414	225.84	165.487	218.593	109.61	167.2	160.91	181.663	166.443	142.872	203.056	138.916	192.914	222.25
4.5	224.069	156.631	223.713	161.192	212.176	108.883	162.077	154.3	184.632	166.05	145.222	193.14	135.491	191.649	211.703
4.6	218.087	152.519	217.731	157.964	211.55	106.724	161.811	150.23	188.496	165.021	140.719	186.153	136.854	188.922	211.971
4.7	212.17	150.423	211.814	154.003	217.584	104.088	163.721	147.738	186.602	165.028	137.176	177.313	137.821	180.811	208.272
4.8	202.836	151.093	202.48	156.148	216.689	104.76	161.984	148.445	190.634	164.739	138.534	167.032	136.499	173.76	203.375
4.9	200.331	153.297	199.975	152.251	211.402	103.711	157.786	146.186	194.192	167.059	135.475	162.681	136.712	167.551	203.151
5	197.92	151.39	197.564	149.773	209.966	102.518	154.418	143.64	191.834	165.105	130.801	156.121	137.26	157.07	198.758
5.1	193.494	151.731	193.138	149.248	215.089	103.708	151.443	142.331	193.984	161.858	123.502	153.936	141.844	150.261	194.472
5.2	193.511	149.984	193.155	147.121	221.209	105.142	150.891	141.237	197.347	161.708	123.428	152.596	144.053	143.38	189.07
5.3	189.296	151.683	188.94	144.847	227.002	107.17	151.188	140.703	199.429	162.845	120.613	150.39	146.691	143.26	189.699
5.4	188.76	153.59	188.404	144.951	220.201	106.808	150.241	139.296	200.442	160.525	117.969	146.692	146.476	140.677	189.884
5.5	188.949	149.499	188.593	145.395	221.918	106.708	150.422	138.612	204.337	159.982	113.782	145.122	145.819	138.578	189.141
5.6	186.334	151.396	185.978	142.589	225.732	106.14	150.129	139.737	205.868	160.259	112.387	141.626	146.756	136.523	184.938
5.7	186.148	152.291	185.792	140.916	228.134	108.689	148.07	142.126	205.609	161.505	111.384	138.684	146.686	133.106	184.151
5.8	188.428	151.242	188.072	139.95	231.679	108.949	146.816	140.331	209.861	160.577	104.75	134.756	142.678	130.679	187.223
5.9	190.481	148.217	190.125	136.427	236.039	109.097	144.327	140.561	209.773	160.044	99.1245	131.68	141	125.705	188.75
6	188.957	146.143	188.601	132.386	236.693	110.884	138.731	141.54	203.736	158.857	97.3622	128.96	138.345	126.647	188.874
6.1	188.12	142.481	187.764	126.981	237.294	110.455	135.86	142.363	198.27	158.198	93.3699	126.258	134.866	125.139	190.455
6.2	191.013	138.043	190.656	123.164	237.126	107.481	131.455	141.4	196.11	154.547	91.2324	126.531	128.174	124.376	191.477
6.3	190.716	133.688	190.36	122.306	239.172	103.246	127.441	140.183	195.172	146.611	88.8974	125.979	120.344	118.862	189.072
6.4	193.161	128.645	192.805	118.435	234.176	99.793	118.544	140.22	191.622	138.725	86.781	121.706	116.031	116.229	186.039
6.5	194.256	124.628	193.9	116.763	227.753	97.6472	115.321	139.881	185.803	135.161	83.862	117.818	109.676	115.569	187.654
6.6	192.01	120.844	191.654	114.461	224.993	94.8282	114.09	136.632	183.318	134.082	83.047	116.341	105.96	116.21	187.246
6.7	194.209	118.523	193.853	111.875	224.397	88.2169	110.948	135.461	183.48	129.898	79.9529	115	104.363	112.177	186.249
6.8	191.334	115.888	190.978	108.583	221.163	84.1844	107.78	135.632	179.205	124.381	77.1674	114.236	98.4517	108.547	185.406
6.9	190.828	111.514	190.472	105.665	213.261	80.2791	106.588	133.682	174.543	120.695	74.9517	111.437	92.078	106.895	184.824
7	184.312	106.883	183.956	102.674	207.594	76.8994	103.944	132.535	175.403	115.247	73.2475	109.865	90.3429	106.553	185.06
7.1	181.529	104.493	181.173	100.491	205.795	74.6101	101.412	131.747	170.684	113.431	70.7051	105.975	86.318	101.819	180.851
7.2	176.31	103.551	175.954	97.5542	202.657	73.4797	99.2377	132.204	166.779	113.568	68.421	102.13	81.5471	99.4269	175.236
7.3	173.246	102.159	172.89	95.6745	202.963	69.5787	96.9753	126.823	163.83	109.754	67.3542	103.085	79.0121	100.176	173.169
7.4	173.439	99.3316	173.083	90.9478	200.198	66.8251	94.1789	122.918	159.323	106.043	64.545	102.335	77.8878	97.5708	170.246
7.5	169.368	93.8195	169.012	87.4493	192.883	64.3764	89.6749	121.905	154.751	102.231	63.1284	98.5694	75.3746	95.7727	168.106
7.6	163.461	92.7891	163.105	84.6448	186.79	63.3655	87.6999	118.118	153.249	98.3335	62.0177	96.2706	71.0019	92.5241	165.238
7.7	159.317	92.5713	158.96	83.9649	186.432	62.2204	86.7751	114.486	154.092	94.8805	60.0992	95.4197	69.2831	89.5433	159.803
7.8	156.369	91.5167	156.013	81.346	184.354	59.6802	84.9499	111.842	148.759	90.5382	59.5926	92.4603	67.3573	89.0433	157.854
7.9	152.379	89.2346	152.023	77.9676	173.347	58.1508	80.751	108.344	144.058	85.5931	56.8469	92.1198	63.5482	85.703	158.644
8	148.571	86.5319	148.215	75.8253	163.714	55.9165	77.9658	107.528	136.311	83.5017	54.7229	88.5082	61.2863	83.9223	152.68
8.1	146.068	83.5543	145.712	73.6871	158.52	54.7483	76.0625	105.458	133.263	81.835	51.826	85.3075	60.7725	79.0423	149.451
8.2	143.07	81.216	142.714	71.0864	155.53	52.7454	74.5527	102.671	127.929	79.9294	51.8173	81.6115	59.4935	77.4092	146.361
8.3	136.801	79.3184	136.445	69.3917	149.232	51.576	72.9952	99.9408	125.093	76.9869	50.3603	78.2017	56.9512	75.1336	140.68
8.4	132.119	78.5515	131.763	66.0772	141.01	50.5509	71.3804	96.4422	122.123	73.6116	49.782	76.3135	54.1264	73.357	136.769
8.5	126.85	77.5629	126.494	65.1399	135.499	49.207	67.9132	93.6427	119.881	72.2896	48.3558	75.3569	53.8047	70.3777	135.073
8.6	122.375	76.2718	122.019	63.1518	133.292	46.8685	65.769	92.7933	115.522	70.2823	46.5793	74.1669	51.6199	67.6632	131.302
8.7	121.487	75.4141	121.131	60.3738	129.052	45.8482	64.3115	89.9487	109.964	65.8106	45.5745	71.4782	50.2996	67.2141	126.636
8.8	118.534	74.5202	118.177	59.0637	125.247	45.8157	63.2098	87.0811	104.82	63.6902	46.1372	69.7682	49.2217	65.3615	125.904
8.9	116.213	72.5754	115.857	57.097	118.985	43.7627	61.7384	85.8769	105.574	61.3018	46.0689	67.5188	46.9838	63.8797	120.901
9	112.644	72.2725	112.288	55.2786	114.594	42.4257	59.959	83.5308	100.806	60.8148	44.3693	64.469	45.5149	61.34	117.8
9.1	113.4	71.8752	113.044	55.7366	109.417	40.4354	58.7198	81.2889	97.9535	59.2709	43.2758	63.4308	46.2311	58.9822	114.922
9.2	109.985	69.2174	109.629	54.8891	104.129	39.9291	55.5065	79.195	95.2417	57.9262	41.9224	62.4706	45.9793	57.7762	112.563
9.3	106.343	68.0235	105.987	53.1461	102.498	39.4182	53.6792	77.672	94.7834	55.2684	41.9551	59.999	43.429	56.1934	108.149
9.4	102.728	67.1984	102.372	52.5191	99.3316	38.3149	53.8501	75.4959	93.4086	54.2944	40.7792	58.3614	42.4688	53.7701	107.732
9.5	101.427	66.8389	101.071	51.3469	97.0238	37.9791	52.6588	73.2312	90.19	54.8098	39.5248	57.0894	41.0245	52.8855	104.923
9.6	98.7254	65.9638	98.3694	49.9197	95.3782	37.4996	50.4716	72.8242	88.565	52.9686	39.5622	55.9649	40.1386	51.1605	101.783
9.7	95.3087	65.1647	94.9527	48.7218	93.4673	36.3927	48.7452	70.4597	86.2389	51.7868	39.4144	54.5726	39.7558	50.7592	99.2283
9.8	95.282	64.0763	94.926	47.4983	89.9662	36.0274	48.543	68.1943	84.1134	51.2776	37.7813	53.3341	38.1436	49.4654	95.3884
9.9	91.9961	62.6902	91.6401	46.8027	85.1607	35.8383	48.1824	68.0229	82.4414	49.0626	36.4288	51.1064	37.9825	47.7028	93.9029
10	90.1417	62.2211	89.7857	45.87	83.4414	34.4182	46.6869	68.6573	79.6535	47.9672	36.1225	48.7265	38.0376	47.6298	92.0945
10.1	87.3225	61.6292	86.9665	44.9076	83.5165	32.7511	45.715	67.2615	79.3266	46.9432	35.4123	48.6654	37.325	47.3814	90.0927
10.2	83.3935	62.3315	83.0375	43.7204	82.4943	32.8149	44.1841	62.9184	77.6454	46.6669	34.1211	48.604	35.9608	45.4419	89.5495
10.3	84.094	61.5348	83.7381	42.8118	80.4	33.1458	43.4123	62.2663	76.7201	46.178	33.6359	47.6587	35.5131	44.273	86.3863
10.4	83.849	60.8989	83.493	42.4613	79.0116	32.1329	43.0219	60.9652	75.9315	45.9641	33.1749	46.8137	34.231	42.5648	83.6816
10.5	80.4614	60.7921	80.1054	42.071	76.3224	31.2853	42.4769	59.7578	73.9225	45.5873	32.1905	44.7232	34.2115	41.7616	80.1814
10.6	79.6185	59.1182	79.2625	41.4901	75.5229	30.6228	42.3179	59.1462	71.9101	45.189	30.6395	42.3223	34.5769	41.7403	78.1981
10.7	79.3805	58.3605	79.0245	40.842	74.0675	30.5103	42.5639	58.964	72.3283	43.9429	31.298	41.3475	34.0045	40.9797	79.1804
10.8	78.527	58.0266	78.171	39.5226	71.6175	30.111	40.6335	58.3187	70.8517	42.8186	31.5046	41.9824	33.4904	39.1389	76.7126
10.9	75.7318	57.3202	75.3758	39.3185	71.7467	29.3637	38.9724	55.6655	69.2994	40.9813	30.1408	41.7925	32.0351	37.8295	74.4801
11	74.3236	57.0935	73.9676	37.9969	71.1423	28.7044	39.0523	55.0794	69.4273	40.4185	29.0784	40.3073	30.889	37.8412	72.3155
11.1	72.5311	56.5382	72.1751	37.227	68.4993	28.6024	38.6618	55.6676	69.5482	41.1952	28.5435	39.7741	29.9363	37.6069	72.8164
11.2	71.3185	56.2287	70.9625	37.1431	65.8049	28.5648	38.0121	54.9813	67.4852	39.4116	28.0447	39.289	29.2992	36.4075	70.6267
11.3	70.4981	56.2425	70.1421	35.0084	65.1032	27.872	37.4208	54.0944	69.3956	38.3871	27.9943	38.3352	29.2192	36.29	69.3359
11.4	70.0975	55.2141	69.7415	34.2506	64.3942	27.8367	36.6278	52.6069	67.9721	38.1316	28.1812	37.3191	27.8894	35.871	68.8648
11.5	68.4929	54.7967	68.1369	33.9866	63.1138	27.0663	35.4132	51.6626	66.2407	37.6624	27.3815	36.556	27.3045	34.8652	67.8335
11.6	67.8872	53.6066	67.5312	34.198	61.6053	26.1718	35.1307	51.2304	66.6204	36.9152	27.0969	36.183	27.0572	34.3758	66.129
11.7	67.7096	53.5037	67.3537	33.5926	61.889	25.5662	34.6056	49.4075	65.0699	36.5155	26.5449	35.2532	26.9786	33.3132	64.7693
11.8	65.6891	52.4917	65.3331	32.8225	61.3674	24.7963	33.0693	48.7023	62.7995	35.5265	26.2855	35.2573	27.4684	32.4472	64.2526
11.9	65.098	52.3703	64.742	31.8001	59.206	23.9106	32.3583	47.6517	60.9984	34.6107	26.0026	35.779	27.1706	31.0635	62.2597
12	64.9791	52.2793	64.6231	31.1786	57.9842	23.5043	31.8641	48.2471	60.1338	34.0056	25.1069	35.1529	25.8045	31.1315	61.1893
12.1	62.8898	52.1292	62.5338	30.3715	55.7643	23.4674	30.9441	47.3755	57.903	32.7494	24.9321	33.5747	24.9484	29.921	61.5528
12.2	60.9492	51.566	60.5932	29.8455	53.8557	23.4894	31.2955	45.704	55.7951	32.3287	24.7547	33.1259	24.6731	29.2593	61.014
12.3	60.7	50.9067	60.344	29.2844	52.8702	23.0857	31.3159	44.3386	54.7655	31.9073	23.9523	32.5409	25.2756	29.2788	59.3438
12.4	59.9502	50.5981	59.5942	28.7628	52.2364	22.646	29.8445	43.1741	52.1347	31.2486	23.6654	31.5764	24.7802	29.2315	58.2767
12.5	58.0405	50.2425	57.6845	28.4875	50.7627	22.2273	29.0341	42.1757	50.1807	30.2416	23.2755	30.8412	24.3782	28.5686	57.5429
12.6	58.3515	49.8573	57.9955	28.3991	48.7026	21.7446	28.2738	41.096	50.5847	28.9651	22.7746	30.5202	23.7661	28.4339	57.0538
12.7	58.0541	49.2652	57.6981	27.972	47.4919	21.6653	28.5121	41.1982	50.6116	27.5337	22.6949	30.3814	23.3732	28.0944	55.318
12.8	57.204	49.3796	56.848	27.2799	48.1598	21.7473	28.4722	39.9885	49.69	27.3251	22.432	30.0841	22.8942	26.8193	54.8414
12.9	55.7771	49.4819	55.4211	26.9423	48.3641	21.3392	27.2942	39.6969	48.0683	26.7889	22.2146	29.4547	22.4162	26.4256	53.7295
13	55.881	48.845	55.525	26.2355	48.6417	20.8623	26.6325	39.9375	47.7854	26.5171	21.3478	29.0282	21.9613	26.3888	53.0209
13.1	55.2262	48.07	54.8702	26.3188	47.6047	20.2387	26.2961	39.1623	47.5114	26.3525	21.0385	28.1869	21.6517	26.6189	51.6397
13.2	53.7575	47.9431	53.4015	25.0992	45.8026	20.1751	26.2672	38.7476	46.6104	25.6229	20.8495	28.022	21.5316	26.3046	50.1209
13.3	53.1325	48.001	52.7765	24.7502	45.5004	19.8593	25.8815	38.3346	45.5682	25.5662	20.84	28.219	21.2712	25.1667	49.9923
13.4	52.7864	47.9323	52.4304	25.0169	45.042	19.5769	25.3078	37.6478	45.6766	25.2568	21.0247	27.8465	20.8778	24.9631	48.8708
13.5	52.8983	47.2708	52.5423	24.4409	44.0342	19.4539	24.4008	36.9594	45.9426	24.5382	20.5095	27.2451	20.3989	24.7144	47.5447
13.6	52.0603	46.7601	51.7043	23.9239	42.7104	19.1936	24.0804	36.8179	45.3328	24.1326	20.2919	27.0628	20.3957	24.2021	47.5819
13.7	50.1668	46.5047	49.8108	23.547	43.2614	18.7952	23.6892	35.8915	44.8616	23.6468	20.0902	26.8748	20.0518	23.6932	46.9405
13.8	49.2505	45.474	48.8945	23.0832	42.3254	18.5129	23.4105	35.556	44.0951	23.1578	19.7404	25.5419	19.612	23.9044	44.8682
13.9	49.838	44.6969	49.482	22.566	41.6316	18.1595	23.1858	35.4124	44.3792	22.8205	19.2123	24.8505	19.7976	23.5357	44.1279
14	48.8533	44.9954	48.4973	22.3745	40.7497	18.0721	22.9129	35.0891	43.7777	22.4586	19.2148	24.5498	19.737	22.6651	44.7975
14.1	46.7035	44.837	46.3475	22.6158	40.1487	17.5527	23.1543	34.3243	42.8018	22.2726	18.7746	24.3956	19.2566	22.0398	43.1558
14.2	46.9104	44.74	46.5544	22.3726	39.2112	17.2773	22.1278	33.1824	42.3335	21.8636	18.45	24.7073	18.6048	21.9445	41.9956
14.3	46.6657	44.8175	46.3097	21.8459	38.9852	17.1471	21.8438	32.2014	41.8268	21.6056	18.3872	23.8898	18.6254	21.6122	42.144
14.4	44.7288	44.8798	44.3728	21.2244	38.5514	16.5697	21.9309	32.2593	41.6306	21.208	18.1312	23.6844	18.3763	21.3046	41.7371
14.5	44.1021	44.0636	43.7461	20.8412	37.763	16.4862	21.4186	31.9447	41.2677	20.9273	18.1789	23.481	17.867	21.038	40.5737
14.6	43.937	43.5886	43.581	20.7117	37.1655	16.2591	20.8913	32.1679	40.9428	20.9774	18.2255	23.4524	17.6113	20.9067	40.9027
14.7	42.6382	44.0748	42.2822	20.177	37.6751	15.7568	20.8317	31.9692	40.9699	20.7341	17.7922	23.0414	17.373	20.6159	39.829
14.8	41.8145	44.3156	41.4585	20.2322	37.7994	15.6606	20.8307	31.6476	40.6783	20.1233	17.7022	22.4698	17.2354	20.3185	37.6172
14.9	41.9365	44.011	41.5805	19.8047	36.9044	15.4455	20.039	30.766	40.389	19.6502	17.4087	21.8774	16.9896	20.0449	37.5517
15	41.3216	43.3244	40.9656	19.0881	36.0494	15.4543	19.2843	31.0436	39.9819	19.4699	17.1142	21.5287	16.5749	19.3391	37.0399
15.1	40.6291	43.1926	40.2731	19.1399	34.9282	15.0279	19.3509	30.5975	39.228	19.3508	16.8895	21.3316	16.1733	19.3299	36.6568
15.2	40.0089	43.1811	39.6529	18.6131	34.3487	14.8035	18.9726	29.6611	39.2102	18.7365	16.5576	21.0532	15.961	19.0578	35.4912
15.3	38.6364	42.8912	38.2804	18.2809	34.0097	14.8106	19.023	28.7029	38.8502	18.6438	16.7741	20.5405	15.6655	19.0485	35.6651
15.4	37.7503	42.4615	37.3943	18.2211	33.1172	14.6373	19.0155	28.1885	38.3228	18.8655	16.6166	20.253	15.576	18.4885	34.3807
15.5	38.0901	41.7362	37.7341	17.9329	32.5987	14.5145	18.0895	28.1705	37.6011	18.3591	16.2506	20.7487	15.6884	18.2873	35.08
15.6	37.4384	41.5237	37.0824	17.7225	32.4352	14.2955	17.7361	27.461	37.8414	18.0275	16.0738	20.6457	15.579	17.8797	33.851
15.7	36.5361	41.5487	36.1801	17.5005	32.6204	14.2021	17.7643	27.0502	36.9592	17.7722	15.9341	19.9505	15.3749	17.6068	32.6875
15.8	35.9411	41.4219	35.5851	17.0887	32.5514	14.2236	17.4824	26.8452	36.7965	17.2765	15.74	19.6063	15.0509	17.399	32.7277
15.9	35.1743	41.7243	34.8183	16.8926	31.213	13.9977	17.2276	26.7837	36.2839	16.9346	15.5893	19.1269	15.2587	17.3234	32.6236
16	35.0126	41.8696	34.6566	16.5379	30.4965	13.5405	16.9837	26.6369	35.9498	16.8921	15.3812	19.3992	15.1747	17.3108	32.0625
16.1	34.7438	41.6587	34.3878	16.3602	30.792	13.143	16.6907	25.8352	35.5839	16.4259	15.4132	19.109	14.7977	17.1807	31.2933
16.2	33.3496	41.0801	32.9936	15.9608	31.1923	13.1603	16.3451	25.0052	35.7684	16.4087	15.1449	18.6266	14.412	17.1757	30.7224
16.3	33.0917	41.0917	32.7357	15.6734	30.444	13.1561	16.0524	24.8186	35.0572	16.2504	14.9454	18.6577	14.5662	16.9975	30.4005
16.4	33.2145	41.1393	32.8585	15.4442	28.956	12.7763	15.8538	24.6838	34.5338	15.8521	14.8213	18.0384	14.1611	16.8285	30.7968
16.5	31.7804	40.9275	31.4244	15.3551	28.7933	12.5761	15.9257	24.4638	34.6546	15.9121	14.5682	18.0782	13.8792	16.4169	30.4094
16.6	31.3128	40.8279	30.9568	15.1417	28.6027	12.5846	15.714	24.1071	34.9376	15.7725	14.4682	17.8303	13.9009	16.2272	28.7987
16.7	31.4425	40.5322	31.0865	15.0568	28.2468	12.4515	15.1771	23.4998	34.8083	15.3336	14.4445	17.9259	13.7882	16.2631	28.1363
16.8	31.1418	40.3536	30.7858	14.8167	28.1084	12.2239	15.1262	23.4641	33.9639	14.9387	14.154	18.5219	13.5015	15.687	28.7011
16.9	30.9907	40.1155	30.6347	14.4847	28.0843	12.1877	14.5818	23.4496	32.9129	14.8976	14.3423	17.8537	12.9774	15.6098	28.3215
17	30.3894	40.1355	30.0334	14.3227	27.2308	12.1158	14.4107	23.4113	33.2801	14.6593	14.118	17.0352	12.9399	15.737	27.5958
17.1	29.814	39.6902	29.458	14.2161	26.4518	11.8231	14.5402	23.4617	33.3411	14.2094	13.9383	16.6599	13.2923	15.2932	27.3184
17.2	29.2871	39.1013	28.9311	14.0403	26.2544	11.6571	14.2658	22.7848	32.8346	14.2904	13.808	16.4559	13.4171	15.1843	27.1294
17.3	29.0914	38.9396	28.7354	13.5291	25.9828	11.4679	14.1181	22.3519	32.1966	14.0233	13.5013	16.3343	13.4042	14.9325	26.2965
17.4	28.3199	39.1277	27.9639	13.2426	25.8806	11.2404	13.9581	22.154	31.8252	13.8304	13.631	15.9694	13.0627	15.0781	26.0231
17.5	27.2834	39.1965	26.9274	13.2104	25.4193	11.3057	13.3556	21.527	30.9774	13.8912	13.4777	15.6676	12.9028	15.0186	26.0577
17.6	27.6074	39.2125	27.2514	13.1552	25.1949	11.1028	13.2081	21.3737	30.9403	13.6016	13.4234	16.0646	12.528	14.551	25.718
17.7	26.7482	39.0872	26.3922	12.7418	25.039	11.13	13.3983	21.5479	31.1683	13.5617	13.3589	15.7537	12.4713	14.2884	25.1192
17.8	26.175	39.019	25.819	12.7867	24.4355	11.1563	13.2305	21.3511	31.4493	13.2001	13.3787	15.4485	12.475	14.5862	24.4401
17.9	26.1334	38.9815	25.7774	12.7009	24.1685	10.8769	12.8541	20.7932	31.3409	12.9377	13.1094	15.3541	12.4384	14.4418	24.3242
18	26.1542	38.6205	25.7982	12.6397	24.0296	10.5601	12.8109	20.2605	31.2626	13.0209	12.8793	14.9046	12.3161	14.2805	24.0799
18.1	26.0088	38.3866	25.6529	12.5409	23.4257	10.5125	12.793	20.1344	30.3846	12.9294	12.8579	14.7384	12.1432	14.1411	23.4473
18.2	25.6121	38.6428	25.2561	12.3922	23.0524	10.4205	12.6681	20.2035	30.0378	12.7891	12.8641	14.67	12.0645	13.9872	22.9123
18.3	25.3333	38.5811	24.9773	12.2847	23.0885	10.1657	12.6176	20.0921	29.6728	12.7076	12.7341	14.77	11.9042	13.7514	23.282
18.4	24.9203	38.4891	24.5643	12.1446	22.182	10.2367	12.342	19.7128	29.6172	12.4906	12.477	14.5867	11.8869	13.4479	23.0047
18.5	24.7132	38.4827	24.3572	11.9441	21.817	9.9651	12.1723	19.3089	30.1628	12.2119	12.1882	14.0261	11.7917	13.0506	22.5585
18.6	24.9337	38.2327	24.5776	11.8467	21.4641	9.75006	11.9155	19.119	30.0622	12.1709	12.406	13.7456	11.8658	12.9033	22.555
18.7	24.4153	37.8612	24.0593	11.7334	21.1842	9.58541	11.8557	19.3178	30.0462	12.0188	12.4759	13.9241	11.7507	12.9946	22.4692
18.8	23.9271	37.9323	23.5711	11.5544	21.1177	9.53497	11.5933	18.5945	29.1778	11.8914	12.3746	14.3438	11.7122	13.0934	22.044
18.9	22.903	37.8885	22.547	11.3776	21.4178	9.40798	11.5206	18.1713	29.1441	11.8163	12.2177	14.1713	11.4727	13.0276	21.396
19	22.7603	37.8586	22.4043	11.3261	21.2085	9.27669	11.6758	17.9829	28.3766	11.6776	11.9727	13.9063	11.2203	12.8643	21.3409
19.1	22.6793	37.9597	22.3233	11.1556	20.9573	9.25749	11.4142	18.087	27.9231	11.7013	12.1295	13.5367	11.0622	12.5951	21.2628
19.2	22.943	37.3536	22.587	11.2585	20.4515	9.09603	11.3105	17.7849	28.1689	11.4866	12.0876	13.0908	10.9826	12.4207	21.0891
19.3	22.9012	37.13	22.5452	11.2532	19.9874	9.20899	11.3337	17.7879	27.7637	11.3439	12.0601	13.1	10.8652	12.425	20.2041
19.4	22.1977	37.558	21.8417	11.013	19.5129	9.22226	11.1846	17.6287	27.0795	11.2537	11.7788	12.8673	10.7572	11.7596	20.0896
19.5	22.338	37.5411	21.982	10.9622	19.5121	9.01212	10.9153	17.5158	27.189	10.9816	11.6102	12.2618	10.7575	11.6838	20.0802
19.6	22.0463	37.343	21.6903	10.8582	19.6559	8.88853	11.0828	17.3449	27.5377	10.9687	11.5334	12.4368	10.9215	11.6712	19.9443
19.7	21.4669	37.122	21.1109	10.982	19.2571	8.82086	10.8741	17.3543	27.7062	10.9549	11.5125	12.3717	10.6811	11.8474	20.0058
19.8	21.6578	37.6291	21.3018	10.9843	19.0167	8.75246	10.8619	17.2609	26.9589	10.8588	11.5681	12.3049	10.8444	11.8825	19.416
19.9	21.0607	38.6459	20.7047	10.6367	19.1655	8.59059	10.8475	16.9625	27.3932	11.2453	12.001	12.2649	11.7516	11.7568	19.3818
20	20.6675	38.8706	20.3115	10.5031	19.2795	8.59991	10.5739	16.7677	27.8456	11.9458	12.4936	12.8034	12.6606	11.607	19.3525
20.1	20.5201	37.3747	20.1641	10.3968	18.7638	8.56319	10.3457	16.873	26.8822	10.9649	11.3815	13.1777	10.6088	11.2232	18.9746
20.2	20.4887	36.7754	20.1327	10.2355	18.5465	8.20157	10.1046	16.6108	26.5097	10.5724	10.966	12.1506	10.2081	11.1774	18.8911
20.3	20.1386	36.4731	19.7826	10.2851	18.3762	8.19642	10.2828	16.5035	26.0931	10.4327	10.9377	11.6361	10.2162	11.1227	18.7178
20.4	19.4723	36.7204	19.1163	10.2521	18.2835	8.34777	10.2586	16.8366	26.2819	10.4598	10.8432	11.4734	10.0444	10.7839	18.3975
20.5	19.1856	36.7399	18.8296	10.0336	17.9618	8.18253	9.95598	16.5177	26.1926	10.3568	10.6691	11.2852	9.81567	10.8196	17.9815
20.6	19.2183	36.6546	18.8623	10.0396	17.5618	8.0932	9.81829	16.2412	25.8577	10.1617	10.6917	11.61	9.82067	10.683	17.801
20.7	19.4335	36.7968	19.0775	9.8948	17.3665	8.0955	9.8341	15.9664	25.4835	10.0974	10.4015	11.5641	9.95383	10.5718	17.8025
20.8	19.4036	36.8116	19.0476	9.84165	17.2346	8.06922	9.88541	16.153	25.0561	10.0277	10.2631	11.5909	9.72255	10.634	17.6402
20.9	19.1094	36.9422	18.7534	9.61081	17.2992	7.98153	9.59808	16.2532	24.8233	9.98534	10.279	11.3755	9.53172	10.3823	17.6318
21	18.8335	36.7658	18.4775	9.5046	17.0502	7.88869	9.67597	15.9962	24.8118	9.75238	10.2342	11.0731	9.67902	10.2734	17.5899
21.1	18.2557	36.7517	17.8997	9.5004	16.7677	7.81513	9.81913	16.1005	24.4931	9.69248	10.2177	10.9386	9.77635	10.0534	17.1362
21.2	17.8229	36.4439	17.4669	9.41566	16.8837	7.77392	9.67533	15.9108	24.6839	9.66097	10.0259	10.7751	9.59444	9.96245	17.1897
21.3	17.8231	36.2453	17.4671	9.21832	16.7299	7.68259	9.50728	16.1195	24.6519	9.48583	9.97727	10.6928	9.43704	9.85887	17.0819
21.4	17.8496	36.1472	17.4936	9.19098	16.2053	7.63074	9.27905	15.7201	24.0418	9.5956	9.82671	10.7018	9.4148	9.82638	16.7519
21.5	17.6234	36.0573	17.2674	9.0277	15.7846	7.46094	9.28737	15.2982	24.0924	9.53143	9.73572	10.487	9.48213	9.72482	16.9457
21.6	17.4699	36.0854	17.1139	8.94709	15.9728	7.37249	9.36569	15.2252	23.9901	9.40388	9.72949	10.3205	9.34577	9.6545	16.8864
21.7	17.5453	36.145	17.1893	8.81509	15.7644	7.54193	9.50667	15.0154	24.1601	9.26703	9.90093	10.3192	8.82334	9.48205	16.6454
21.8	17.4592	36.14	17.1032	8.65259	15.547	7.52258	9.30746	15.1546	24.13	9.11916	9.53851	10.1886	8.8269	9.48186	16.3152
21.9	17.2824	36.0584	16.9264	8.59186	15.7091	7.42995	8.97597	15.2521	23.4716	9.04704	9.48628	9.97308	9.10876	9.32788	15.7603
22	17.0532	35.9786	16.6972	8.56293	15.654	7.32797	8.90285	14.8257	23.1452	8.84102	9.67225	9.97913	8.90933	9.27502	15.7907
22.1	16.6317	35.6431	16.2757	8.2897	15.4237	7.23626	9.00078	14.79	22.9135	8.73293	9.50074	9.83536	8.72968	9.20367	15.8197
22.2	16.2961	35.5543	15.9401	8.21214	15.0894	7.14856	8.96198	14.6122	22.7967	8.76027	9.32378	9.66698	8.61472	9.02819	15.5153
22.3	16.148	35.943	15.792	8.21939	14.6468	7.15586	8.78846	14.2678	23.1691	8.62684	9.2023	9.71811	8.82805	9.00684	15.5663
22.4	16.2329	36.1001	15.8769	8.32752	14.6723	7.32323	8.78221	14.2673	23.3487	8.66264	9.19902	9.52623	8.82038	9.10579	15.3462
22.5	16.3042	35.7606	15.9482	8.14741	14.6808	7.3923	8.45883	14.1642	23.7478	8.63614	9.25654	9.35699	8.68598	9.1207	15.3406
22.6	16.1036	35.6609	15.7476	7.90177	14.6633	7.1537	8.48604	13.6143	23.1666	8.47572	8.99668	9.20978	8.67575	8.95983	15.13
22.7	15.8331	35.8157	15.4771	7.88129	14.4585	6.99359	8.41316	13.6518	23.3115	8.40056	9.04507	9.32379	8.64093	8.79483	14.9896
22.8	15.9255	35.5103	15.5695	8.03182	14.3735	6.74288	8.19448	13.7895	23.4349	8.37612	8.94886	9.32588	8.54002	8.73046	15.1565
22.9	15.7797	35.3516	15.4238	7.85616	14.1677	6.69535	8.23908	13.7178	23.2493	8.3889	8.83407	9.13528	8.46239	8.58491	14.9787
23	15.5146	34.9938	15.1586	7.59203	14.1158	6.76039	8.15176	13.2255	22.9523	8.23824	8.73334	9.02632	8.52731	8.58859	14.7977
23.1	15.4483	34.9538	15.0923	7.56643	13.7523	6.84084	7.95667	13.1337	22.4622	8.03594	8.65202	9.14694	8.38499	8.38738	14.7104
23.2	15.1664	34.905	14.8104	7.49601	13.4614	6.80914	7.79376	12.9358	22.5631	8.08095	8.75191	9.06781	8.14023	8.31279	14.4785
23.3	14.9405	35.0441	14.5845	7.3906	13.4263	6.54335	7.62602	12.7131	22.7341	8.02378	8.6186	8.80465	8.07926	8.37088	14.3918
23.4	15.0135	35.2091	14.6575	7.31491	13.419	6.40663	7.59416	12.8321	22.8342	7.95138	8.48016	8.68446	7.95279	8.41012	14.2854
23.5	14.8904	35.0943	14.5344	7.29979	13.3007	6.45547	7.46669	12.8182	22.3739	7.82484	8.39002	8.52341	8.07926	8.34669	14.1922
23.6	14.9453	35.0617	14.5893	7.13025	13.1662	6.36891	7.39273	12.3889	21.9789	7.74897	8.26183	8.53271	7.93272	8.25374	14.096
23.7	14.7253	35.092	14.3693	7.13356	13.1652	6.35838	7.35518	12.253	21.4876	7.7849	8.34061	8.56503	7.83735	8.05773	14.1223
23.8	14.5173	35.3405	14.1613	7.08453	13.0512	6.27523	7.30838	12.6306	20.8557	7.65027	8.18547	8.3912	7.85351	7.87847	13.7665
23.9	14.1689	35.1153	13.8129	6.90103	12.6804	6.30028	7.33171	12.4761	20.4327	7.53325	8.15487	8.3405	7.70155	7.96462	13.6909
24	14.3713	35.0331	14.0153	6.89226	12.5774	6.09109	7.12916	12.3343	20.5441	7.40451	8.13209	8.24182	7.58475	7.84809	13.4786
24.1	13.9806	35.0816	13.6246	6.90426	12.271	5.95972	7.06669	12.22	20.596	7.3983	8.15706	8.05828	7.62547	7.65908	13.3642
24.2	13.6149	35.0589	13.2589	6.72934	11.9836	5.98576	6.9006	11.947	20.2301	7.40448	8.14137	8.03748	7.68169	7.55027	13.6708
24.3	13.5038	34.7606	13.1478	6.63441	11.8453	5.95368	6.99064	11.6155	19.6191	7.30749	8.2212	8.04552	7.62877	7.42734	13.6632
24.4	13.7903	34.4458	13.4343	6.51652	11.6082	5.95567	6.92108	11.4261	19.4448	7.12383	8.17842	7.86799	7.45059	7.4096	13.5049
24.5	13.639	34.5657	13.283	6.49307	11.3706	5.93017	6.6299	10.9886	19.7479	7.10505	8.20519	7.98561	7.33204	7.42488	13.3368
24.6	13.5465	34.5907	13.1905	6.49622	11.2084	5.88144	6.45108	10.7545	19.4642	6.98711	8.08707	7.96543	7.25273	7.34963	13.0784
24.7	13.3912	34.8365	13.0352	6.41572	11.1778	5.90324	6.42477	10.7221	18.6841	6.86093	7.98006	7.77978	7.30009	7.50465	13.1452
24.8	13.3686	34.8408	13.0127	6.37862	11.0159	5.83726	6.41053	10.3399	18.6219	6.8058	7.94961	7.58036	7.39903	7.36551	13.0676
24.9	13.483	34.382	13.127	6.30231	10.7519	5.74212	6.42775	10.0361	18.3967	6.70056	7.87791	7.4611	7.40493	7.11419	12.8207
25	13.4028	34.3653	13.0467	6.26703	10.6433	5.65728	6.2704	9.97472	17.8529	6.61948	7.89256	7.35309	7.26021	7.13991	13.1322
								Fig.2J
	SWS-PSD (μV²/Hz)
	sham	CLP	CLP+DEX
	300.726	269.679	299.901
	283.051	266.167	295.324
	314.87	261.056	321.671
	287.765	271.169	312.557
	302.017	276.541	301.261
	290.131	280.937	310.082
	283.244	276.48	288.27
	292.064	262.614	297.314
		Fig.2K

## Sheet: Fig3.
	GABA	GLU				GLU	GABA					before		during		after
	94	6				85	15					0	0	0.1	-1.5	0.1	0.4
	96	4				92	8					0.1	0.2	0	-2	0	0
	95	5				88	12					0.2	0	0.5	-1.8	0	0.3
	97	3				94	6					-0.1	0	-0.4	-1.9	-0.2	-0.5
	93	6				89	11					0	0	0.3	-1.62	-0.1	-0.4
	90	10				85	15					0	0	0	-1.57	0	-0.1
												Fig3M
	Fig3F					Fig3I

## Sheet: Fig4.
	Fig.4D				Fig.4E			Fig.4F				Fig.4G				Fig.4H
	Time spend in the center(s)				center entries			Total Distance travelled (m)				The ratio of entries in novel arm(%)				Time spent in novel arm (s)
	mcherry	hM4Di			mcherry	hM4Di		mcherry	hM4Di			mcherry	hM4Di			mcherry	hM4Di
	13.1	7.1			8	2		16.176	10.103			48.57	33.33			132.8	42
	10.3	6.9			4	5		16.031	15.513			38.89	21.58			97.2	44.1
	15	9.6			3	4		6.942	18.002			40	33.33			83.2	32.8
	7	3.7			6	3		17.847	17.901			33.33	16.67			71.9	12.6
	10	2.9			5	2		13.725	12.506			30.43	31.47			148.4	55.4
	8.8	6.7			6	3		6.394	10.076			34.48	40			118.4	26.9
	12.9	8			12	2		19.672	8.419			38	37.5			132.7	47.4
	9.2	3.1			11	1		19.764	12.32			50	30.77			101.5	63.2
	14.8	5.5			3	0		15.169	10.075			42.86	37.5			116.8	65.4
	8	2.9			12	5		18.261	18.476			47.06	27.78			141.8	37
	7.8	3.5			8	6		16.534	19.477			36.84	35.71			122.8	74.3
	9.6	4.5			7	2		17.931	13.657			39.13	31.58			113.9	79.4
		3.2				0			16.836				33.33				59.6
		11				7			5.679				29.41				69.2
	Fig.4I				Fig.4J				Fig.4K
	Distance traveled (m)				Freezing Total (%)				Freezing Total (%)
	mcherry	hM4Di			mCherry	hM4Di			mCherry	hM4Di
	4.309	5.931			87.46	31.07			88.59	16.24
	8.894	6.594			91.76	42.47			90.58	24.27
	5.379	5.88			41.51	65.17			74.63	29.72
	2.618	4.314			61.72	57.38			44.02	47.39
	10.651	4.647			55.8	67.04			64.41	46.39
	6.132	4.603			73.16	47.47			77.19	25.57
	8.915	4.11			79.08	57.53			80.73	50.33
	9.912	7.675			68.57	63.96			53.66	40.96
	8.773	14.01			75.63	56.58			68.97	48.34
	11.999	8.449			69.35	47.24			90.7	25.74
	12.704	11.003			85.74	62.85			86.39	51.16
	8.319	12.752			69.33	49.91			82.91	42.69
		9.827				56.29				48.74
		8.043				48.05				33.29

## Sheet: Fig5.
mean duration (minutes)
	mcherry								4Di
wake	274.933	223.467	263	227.667	272.8	267.667	270.333	264.067	359.467	500.1	358.2	338.733	539.467	346.733	403.4	415.8
NREM	423.2	479.133	406.933	440.067	388.6	406.4	405	424.933	331.033	178.133	355.333	362.667	168.533	343.867	281.533	264.267
REM	21.8667	17.4	50.0667	52.2667	58.6	45.9333	44.6667	31	29	25.2667	6.46667	18.6	12	29.4	35.0667	39.9333
							Fig.5C
	Wake bouts count
	mcherry								4Di
2	44	33	19	22	31	36	25	18	34	42	42	44	27	62	50	32
4	23	41	35	29	43	33	44	38	42	47	53	42	59	41	44	39
6	30	50	30	33	36	44	35	20	45	44	64	26	35	87	36	27
8	25	49	39	42	31	47	41	20	48	51	45	41	33	45	48	68
10	31	36	43	45	41	52	56	57	45	73	63	59	55	46	60	59
12	45	51	48	60	62	53	56	52	32	44	77	68	89	38	38	54
							Fig.5D
	NREM bouts count
	mcherry								4Di
2	23	21	42	45	26	12	30	33	43	33	59	56	35	36	55	48
4	42	40	33	34	47	33	34	32	41	56	72	49	62	40	64	60
6	50	33	31	39	43	26	25	23	46	73	65	57	35	67	37	58
8	26	32	36	23	42	31	41	22	34	10	25	48	34	46	34	22
10	34	37	26	35	41	29	27	26	38	52	33	57	50	38	36	55
12	28	33	30	34	28	31	34	21	40	43	28	28	19	37	44	25
							Fig.5E
	REM bouts count
	mcherry								4Di
2	0	0	0	7	8	0	0	0	1	3	1	6	0	9	0	0
4	0	0	0	16	12	0	0	0	2	2	1	20	2	0	0	0
6	0	0	2	21	21	3	12	5	6	1	0	21	1	1	0	7
8	2	1	20	11	8	19	8	9	5	2	2	19	6	5	10	6
10	8	5	9	17	7	12	16	8	3	4	1	5	3	12	13	4
12	7	6	20	9	7	13	14	4	4	3	5	4	6	8	16	4
							Fig.5F
	Wake bouts duration
	mcherry								4Di
2	68.8182	52.9697	149.263	102	69.1613	69.4444	116	88.4444	90.5882	85.3333	92	94.3636	156	85.2903	71.76	150.25
4	210.957	35.6735	137.257	45.3793	56.093	67.9245	56.4545	47.5385	84.1905	119.66	120.906	110.095	102.034	132.78	111.273	100.103
6	65.0667	43.68	35.4667	54.1818	51.7778	24.0909	60	102.8	70.3111	110	32.3125	96.3077	166.057	23.8621	49.4444	93.6296
8	52.16	58.8571	26.0513	87.9048	101.161	24.6809	81.7561	121	65.9167	76.1765	75.2889	62.7317	131.394	37.2444	46.3333	60.2353
10	71.0968	62.5556	87.2558	37.7778	100.683	56.5385	42.9286	44.9825	45.9556	70.2466	75.2381	82.5763	95.8545	90.087	41.6667	71.5932
12	50.1333	70.4314	48.0833	48.6667	35.3158	60.3175	53.2143	76.4516	79.875	79.2727	52.2597	55.4118	52.9888	71.4737	78.7368	75.9259
							Fig.5G
	NREM bouts duration
	mcherry								4Di
2	181.391	259.619	103.905	104.444	175.231	391.667	143.333	169.939	95.814	109.576	56.5424	54.1429	85.3714	53.1111	65.6727	49.8333
4	55.9048	136.3	72.6061	150.471	90.5532	109.091	138.706	147.75	89.3659	28.1429	10.7222	52.5714	18.4516	43.9	36	54.9333
6	104.96	152	196.903	112.615	96.9302	229.692	180.64	216.522	81.8261	27.726	78.9538	61.8246	38.9714	76.1791	146.486	71.3793
8	221.385	134.625	142.333	126.957	89.8095	153.29	78.9268	185.818	108.706	278.8	150.56	60.6207	77.8824	114.435	132.706	126.909
10	134.353	120.216	109.231	130.971	66.9268	119.31	145.63	152.923	109.895	39.8462	73.5758	36.0702	36	73.4737	111.667	48
12	150	93.0909	119.6	108.588	136.429	93.5484	105.882	100.762	86.8	86.3256	103.143	109.143	114.105	102.811	80.0909	116.48
							Fig.5H
	REM bouts duration
	mcherry								4Di
2	0	0	0	36.5714	62.5	0	0	0	0	0	0	0	0	0	0	0
4	0	0	0	48	44.3333	0	0	0	0	0	0	0	18	0	0	0
6	0	0	16	48.5714	55.619	56	48.6667	32.8	45.3333	136	0	25.3333	24	106	0	2.85714
8	70	8	53	53.4545	36.5	67.7895	76.5	76.8889	68	123.5	132	16.4211	36	132.8	21.4	43.3333
10	53.5	100	67.5556	53.8824	46.8571	66.6667	54	82.5	118.667	0	110	67.2	42.6667	22	6.69231	101
12	106.286	89.3333	65.2	65.3333	99.4286	38.4615	44.2857	86	93	0	136.8	47	52.6667	3.5	4.75	120
							Fig.5I
	PSD (μV²/Hz)
Frequency(Hz)	4Di								mcherry
0	2.64884	2.60489	2.85472	3.13295	2.57441	2.57442	3.15081	2.89278	1.79059	1.95847	1.50274	1.65402	1.65287	1.62229	1.93911	1.75588
0.1	1.69653	1.80698	1.60218	1.60171	1.74579	1.30702	1.34536	1.58206	1.26304	1.00995	1.3433	1.10652	1.27061	1.29808	1.4349	1.09773
0.2	3.29951	3.42394	2.93999	2.74032	3.87983	3.21012	3.32625	2.7354	3.29954	3.36021	3.89363	3.70834	3.36872	3.13733	3.56586	2.97832
0.3	10.7204	10.8631	9.23972	11.2037	9.94773	10.3452	9.94635	13.1033	10.7159	11.2576	11.852	13.6732	11.1364	10.1705	10.6885	8.8202
0.4	26.7061	23.3164	29.3421	22.7936	27.3754	20.4259	22.4496	27.337	25.1663	24.1363	23.8474	25.5497	23.0966	27.9875	25.1668	25.1429
0.5	53.9111	55.0198	53.163	51.9632	44.3461	49.2542	50.9311	60.75	47.8888	48.632	51.8401	43.7362	44.7371	46.4343	41.4436	43.9655
0.6	110.228	86.9073	114.514	105.134	101.274	118.318	123.865	122.546	93.0257	101.16	95.4682	94.8266	100.941	91.7478	96.6581	92.0655
0.7	167.319	161.11	173.97	186.906	157.698	163.591	145.106	143.301	138.988	130.889	105.092	137.122	158.763	151.862	152.406	156.169
0.8	226.266	263.09	224.31	253.514	236.085	208.749	236.078	268.026	182.62	186.223	171.34	176.848	193.865	204.605	180.073	174.399
0.9	277.548	329.66	190.296	304.922	280.447	267.59	280.604	211.351	222.705	236.094	190.55	171.568	210.444	195.519	211.389	219.414
1	318.189	331.824	374.619	298.4	287.318	299.03	353.141	330.741	258.518	296.067	266.965	266.286	274.603	229.077	285.381	256.559
1.1	364.709	387.173	368.958	407.102	333.984	350.369	347.549	300.659	294.482	262.917	248.726	318.567	305.566	267.918	268.872	327.624
1.2	402.108	414.705	402.355	390.789	333.812	381.811	385.571	363.396	317.473	369.623	288.88	337.74	307.04	336.622	300.199	312.304
1.3	423.789	444.337	519.711	432.667	436.887	420.003	326.211	422.441	331.318	298.114	355.863	314.314	323.744	298.373	246.423	324.989
1.4	444.806	576.285	434.538	460.901	442.953	382.426	505.806	484.941	340.537	367.256	339.882	331.585	341.302	359.169	300.326	378.484
1.5	464.209	413.552	542.352	386.119	496.9	586.229	409.031	432.663	343.666	368.348	358.735	344.34	366.79	364.005	331.499	323.953
1.6	478.887	449.954	389.776	482.828	417.841	506.103	426.051	567.957	338.739	391.21	296.766	289.028	344.32	340.463	344.611	347.003
1.7	504.44	484.945	553.684	429.932	518.209	583.565	407.135	515.616	320.508	368.259	269.198	293.954	317.199	267.843	314.872	373.76
1.8	524.163	573.34	446.36	441.107	556.993	542.844	539.919	545.955	314.979	322.245	275.286	295.564	303.161	304.971	355.348	332.545
1.9	535.795	550.728	554.639	489.866	655.756	566.261	459.2	578.009	317.338	325.161	333.148	353.519	367.495	285.125	291.606	277.43
2	544.022	595.405	619.658	490.446	606.914	570.969	597.688	667.849	324.195	339.314	356.204	321.733	313.826	329.115	297.12	391.937
2.1	550.023	500.275	491.313	496.178	544.934	572.54	568.286	604.62	334.645	340.827	402.364	334.872	328.285	322.683	328.608	380.586
2.2	549.936	645.858	532.47	729.446	591.225	493.37	479.265	581.775	353.716	407.956	303.349	344.284	338.533	374.534	297.188	370.064
2.3	565.804	614.282	597.935	560.859	508.31	462.951	535.487	623.95	361.482	312.205	368.339	337.552	376.877	362.174	338.293	379.117
2.4	580.557	493.771	592.622	607.401	518.982	591.267	584.613	500.93	365.536	358.558	391.846	318.262	330.575	382.804	419.786	378.535
2.5	586.491	625.958	662.715	660.656	489.532	520.488	622.739	622.651	368.133	368.107	322.101	390.387	400.614	351.49	350.829	377.921
2.6	591.259	864.615	631.765	671.829	658.947	637.476	568.891	645.109	367.176	364.748	444.273	358.106	354.019	343.4	394.501	360.522
2.7	606.298	589.068	570.985	612.254	774.702	470.443	656.227	488.963	360.484	408.115	411.658	338.84	293.198	396.803	335.804	388.985
2.8	648.702	733.471	653.706	564.806	593.02	701.605	591.848	665.553	353.754	385.33	310.908	379.605	354.259	320.008	339.355	378.033
2.9	702.933	647.969	883.779	756.405	532.108	718.661	647.11	774.838	344.939	365.098	413.114	290.982	400.723	348.539	313.937	299.051
3	815.112	803.89	864.507	899.795	697.707	782.394	768.656	751.208	334.177	364.977	329.915	384.677	285.682	333.773	292.325	346.329
3.1	935.078	980.52	793.595	1038.07	1173.2	1050.93	764.59	880.742	324.344	310.697	239.878	330.797	338.509	337.457	364.426	289.605
3.2	1008.12	922.51	1061.81	1101.83	895.985	1000.92	616.01	884.195	315.448	353.065	259.343	325.531	299.544	312.876	326.415	300.078
3.3	930.893	791.507	1113.25	771.136	881.737	945.498	1091.89	770.497	301.803	302.834	268.99	269.032	322.307	267.132	321.912	315.764
3.4	909.721	910.838	802.573	960.167	931.452	844.198	917.341	867.658	277.335	258.544	310.452	250.124	264.456	290.15	299.061	270.359
3.5	906.598	978.633	1079.14	771.934	1138.65	694.227	890.085	970.602	262.61	299.963	308.275	288.316	264.851	241.384	240.802	276.332
3.6	920.195	851.435	897.214	865.757	855.116	1014.01	959.618	843.682	247.39	282.064	263.481	210.205	273.414	222.699	237.891	253.58
3.7	926.854	961.033	1017.26	996.883	834.651	864.55	1009.97	994.741	232.208	304.423	246.297	227.954	244.62	252.82	224.762	273.895
3.8	900.751	913.433	1038.85	836.808	959.887	878.896	877.222	1019.52	218.524	229.401	233.076	227.737	236.857	205.036	206.324	194.483
3.9	825.451	906.033	954.764	827.532	893.002	794.718	857.561	812.56	206.124	222.18	215.56	240.639	206.009	219.908	183.621	198.145
4	763.548	818.079	688.578	955.264	671.371	652.297	869.66	836.084	193.613	210.053	187.921	192.227	164.225	186.7	210.852	204.75
4.1	726.167	780.921	725.1	647.98	732.773	667.159	811.139	713.353	184.936	185.856	185.067	172.724	197.86	192.721	194.035	175.208
4.2	691.796	665.116	726.075	644.998	623.539	712.026	712.132	649.712	177.76	197.263	169.249	162.424	190.088	170.792	196.602	188.728
4.3	654.677	672.907	540.914	544.105	598.235	637.908	679.102	770.583	170.181	146.935	190.806	174.627	163.896	172.621	139.953	177.135
4.4	615.994	604.171	614.588	541.888	614.625	594.656	639.849	554.845	157.945	136.58	133.9	175.519	148.006	182.169	149.482	130.978
4.5	555.505	657.678	548.255	582.283	601.51	528.759	570.443	556.344	146.301	164.381	144.02	138.279	148.642	153.642	162.648	167.492
4.6	482.343	437.6	483.762	511.168	566.337	537.867	606.972	437.928	140.775	122.108	134.955	144.439	127.208	127.301	145.615	140.09
4.7	418.962	428.18	529.055	378.324	376.745	388.827	312.182	392.529	134.973	124.735	131.863	122.498	146.988	148.946	110.054	122.427
4.8	373.008	379.74	388.305	456.987	415.55	347.185	332.794	395.027	128.508	120.154	127.435	109.879	116.661	115.606	131.171	129.399
4.9	347.29	423.616	396.443	327.737	275.895	403.712	342.516	398.876	121.879	124.034	115.216	118.568	142.275	138.216	106.04	131.991
5	326.695	303.198	326.901	328.537	309.051	351.113	284.841	321.113	119.959	106.185	129.781	138.408	106.493	108.953	132.167	123.216
5.1	307.319	326.291	333.562	265.844	250.743	354.437	319.574	279.716	117.285	121.28	121.867	101.728	129.569	131.003	114.595	116.775
5.2	300.296	304.464	342.792	302.729	374.556	363.55	291.324	335.307	113.329	119.157	119.812	112.624	126.071	109.543	119.728	101.773
5.3	295.855	344.445	261.598	320.211	333.432	233.415	253.846	223.457	110.971	109.036	113.472	106.871	109.512	120.138	106.124	93.1429
5.4	290.772	315.808	343.193	293.357	347.598	242.616	231.336	288.833	109.659	124.808	95.4879	117.222	104.143	112.548	112.885	107.088
5.5	283.897	282.783	213.464	280.861	239.457	306.711	296.386	251.878	105.315	98.0426	95.6661	96.5547	104.608	97.777	112.498	120.978
5.6	269.829	235.532	267.8	300.756	237.912	286.15	252.66	244.156	104.982	107.495	110.228	109.937	105.779	112.779	110.045	91.9887
5.7	267.161	233.972	249.411	228.758	330.148	268.291	244.728	274.021	103.786	112.994	95.8637	104.179	110.877	101.613	114.921	128.319
5.8	264.838	257.815	284.356	288.912	247.978	246.538	256.096	191.681	102.872	88.6647	105.997	110.295	100.497	117.822	89.1013	110
5.9	263.33	306.523	315.31	255.46	281.549	273.165	360.621	298.708	101.747	119.242	122.021	93.9468	96.1557	110.493	97.8084	101.285
6	262.936	232.786	212.249	269.355	239.071	218.06	242.535	228.81	100.125	80.9039	99.986	93.2187	95.1872	114.579	87.5438	108.267
6.1	258.611	285.972	258.364	304.539	261.012	231.883	305.879	275.335	99.5818	96.7959	107.452	102.968	105.264	109.223	96.2826	93.485
6.2	256.215	250.363	229.293	213.7	284.691	314.922	213.215	273.524	99.1433	90.9599	128.382	111.483	85.7483	86.032	103.921	104.569
6.3	256.709	241.703	238.461	230.094	258.204	231.112	265.041	255.162	99.2148	96.6852	97.9701	102.468	100.067	77.196	96.9348	90.7676
6.4	257.397	229.364	239.582	280.729	272.869	227.202	260.465	280.605	99.1338	128.728	102.777	96.0256	108.272	103.919	103.298	105.15
6.5	256.973	273.729	236.54	274.569	233.437	201.316	206.785	258.456	98.2564	87.1447	102.91	89.1541	103.715	89.2297	94.1555	95.3569
6.6	254.205	226.619	273.685	203.521	252.189	217.264	234.321	255.651	95.5599	104.337	83.6558	96.0848	88.7791	83.5336	93.4861	92.612
6.7	248.016	236.571	277.966	230.847	272.888	214.394	263.784	290.92	92.0208	96.0049	79.3438	86.8237	101.42	111.239	77.4264	74.7216
6.8	246.571	222.992	263.645	240.563	257.552	228.7	249.133	241.964	91.2897	94.8465	83.3631	96.1704	67.2281	91.3206	94.2824	99.7274
6.9	241.721	249.101	251.514	229.774	227.577	229.174	253.163	229.51	91.9504	92.7383	83.4411	94.2986	83.7176	88.1979	82.7938	97.9376
7	237.209	296.285	262.005	227.928	271.401	225.593	179.193	208.513	93.0114	90.8292	93.3671	79.5378	90.2241	92.5444	117.388	82.6688
7.1	235.726	225.783	236.247	283.148	244.974	229.529	259.188	173.18	93.4136	102.726	96.0351	109.842	96.8896	97.0489	92.9174	104.843
7.2	233.982	255.626	192.466	266.096	243.486	222.321	251.749	297.738	90.8745	85.1887	78.8859	89.03	83.6042	90.2973	102.12	86.7188
7.3	223.645	230.306	211.317	200.837	245.929	200.67	225.565	210.825	87.3781	87.8851	94.7916	67.7452	82.0769	89.2243	97.8642	83.08
7.4	217.015	225.704	244.034	203.733	209.987	191.526	205.444	226.84	86.3285	91.6784	80.8435	76.0583	80.9386	84.7355	81.1078	67.2882
7.5	213.115	189.532	235.354	247.784	223.688	261.112	193.326	181.285	84.3361	95.0879	89.8308	74.7413	82.6368	84.2811	89.3861	89.9727
7.6	211.111	249.01	227.688	209.703	218.203	182.598	273.07	214.384	82.0216	82.6941	85.7722	93.9624	87.8	88.4935	82.7091	93.5904
7.7	209.309	227.538	221.391	214.933	189.455	221.151	256.58	243.102	81.9532	74.8963	93.4543	87.6728	78.3223	78.0236	84.3838	85.7492
7.8	201.065	188.73	177.188	198.03	202.409	227.465	160.229	237.969	80.4232	82.9269	94.0948	89.0409	81.9564	87.9936	72.1193	83.6235
7.9	195.677	185.653	171.911	156.819	215.006	197.399	165.387	165.267	78.3335	76.6255	71.6937	73.2255	69.798	72.1862	75.4312	67.3232
8	192.144	230.628	186.159	157.486	186.478	185.856	129.961	190.892	76.3853	83.2774	69.4514	87.9904	80.287	84.2575	71.3604	82.9127
8.1	187.548	203.216	229.16	212.902	181.496	162.645	245.463	188.881	74.7189	81.3708	76.0029	78.8528	65.935	68.0311	79.1814	67.633
8.2	180.69	180.167	184.985	177.56	168.251	168.832	179.98	168.907	73.302	63.2806	79.5192	64.2673	77.3504	77.888	68.1945	77.5683
8.3	175.518	177.76	170.148	207.195	119.683	198.508	201.763	131.848	71.2794	67.4385	64.0905	57.2899	73.7717	60.1256	71.959	69.4015
8.4	172.879	165.173	143.68	156.743	149.84	209.231	192.29	199.258	70.1723	68.0527	67.8605	75.308	72.5235	72.3908	73.4652	59.3968
8.5	169.718	146.723	159.035	179.684	144.828	184.239	164.823	162.084	69.7585	74.031	62.6663	68.0558	69.4843	68.8203	72.0874	79.7435
8.6	165.76	174.597	158.58	188.82	144.256	178.012	177.557	159.603	68.2769	59.3175	72.5243	77.3505	70.918	75.7258	82.0161	75.2665
8.7	162.114	137.775	180.09	158.517	151.945	182.521	148.412	134.714	66.0828	72.989	67.0403	66.2408	63.7606	76.4143	60.6744	76.2091
8.8	160.53	172.204	135.864	194.334	120.425	193.21	164.595	158.667	64.3617	55.3555	66.728	50.8456	68.3876	70.0592	60.5492	65.1569
8.9	158.519	166.112	157.803	179.506	160.692	161.378	151.602	157.436	64.072	60.8315	57.2873	73.5653	76.6467	64.0956	70.5526	72.6671
9	153.257	121.805	128.462	166.926	156.399	149.873	153.596	159.649	63.7042	60.6126	71.5454	74.4385	67.29	58.0994	76.3626	60.3217
9.1	150.379	136.334	153.913	132.724	157.746	119.655	168.95	158.907	62.0905	64.2161	71.7404	67.3929	64.6664	64.9671	62.3607	65.556
9.2	148.354	165.849	178.004	166.413	115.582	125.575	137.231	148.819	60.4392	58.6465	61.8977	53.4825	62.7741	59.2033	71.0491	69.9463
9.3	145.896	133.19	149.166	132.671	135.19	121.269	129.733	122.231	59.4823	58.5851	59.0424	56.7957	60.6423	54.9718	52.7571	63.1863
9.4	141.115	158.958	125.038	185.692	149.469	144.245	126.58	152.974	59.0029	54.2572	64.2857	55.2764	60.4966	63.8431	58.8045	61.686
9.5	138.286	140.311	180.769	136.692	157.357	126.617	137.705	167.671	57.3872	56.2598	56.2059	53.1028	56.3728	48.5001	54.5686	55.7524
9.6	135.046	164.418	146.516	125.931	145.295	150.807	145.123	109.6	54.5331	53.2162	54.1963	57.1477	59.3021	50.9898	47.9717	48.8505
9.7	131.904	127.986	130.725	141.728	134.716	110.767	137.922	141.568	51.5173	49.7043	47.5505	44.8401	49.1675	52.452	54.5827	48.6456
9.8	129.124	145.871	142.046	136.239	128.037	103.388	135.781	132.342	49.1171	44.5654	48.9627	44.9499	51.9322	40.3455	47.3507	50.5961
9.9	126.817	107.387	110.365	142.844	126.215	137.188	127.248	127.27	48.0479	60.9873	49.7286	43.2236	47.5892	39.5134	47.6606	44.0452
10	122.985	115.369	124.404	116.163	116.573	118.422	126.264	115.92	46.3668	43.8188	45.8254	43.4199	54.4293	44.8773	54.8638	50.1418
10.1	121.164	108.156	118.447	114.77	142.202	124.022	136.166	99.5642	45.4008	47.0749	47.1887	36.649	44.1346	49.2379	45.1788	39.0211
10.2	119.084	131.797	120.26	134.31	111.692	139.223	151.935	113.899	43.8652	51.3403	49.3347	43.5932	48.0388	42.2575	36.3911	39.81
10.3	117.161	137.594	139.368	109.81	111.253	113.199	98.2588	104.245	41.9394	40.7902	40.9186	40.6819	49.9252	48.7585	51.2448	41.2723
10.4	115.826	105.154	115.344	119.081	137.376	101.95	129.507	112.852	40.163	34.0717	46.0949	35.4729	41.0337	35.7559	37.798	36.8003
10.5	115.833	125.213	100.228	121.149	118.147	122.678	119.853	149.962	40.2248	38.0562	38.0194	43.5768	35.7805	41.1119	45.124	38.1605
10.6	114.077	106.808	105.547	106.473	105.352	130.354	133.523	106.264	39.823	38.905	44.521	40.596	37.7075	41.7499	35.4333	42.5364
10.7	111.804	118.128	104.395	120.295	114.526	91.4677	132.566	135.898	37.7838	36.6208	34.6153	34.4336	39.8045	42.4274	35.3758	39.5158
10.8	109.58	104.482	113.339	113.978	118.24	136.013	107.253	99.0827	36.5251	34.3898	36.4116	33.2024	33.1045	34.086	37.5923	35.8409
10.9	107.837	98.378	107.408	131.059	101.138	110.732	107.624	123.215	36.0022	28.3672	33.8173	37.65	26.1106	34.2031	34.1076	41.0005
11	106.92	100.109	100.641	120.317	115.669	130.615	114.413	102.311	35.6209	36.9851	36.1241	28.0316	38.3573	36.3882	37.4314	49.6065
11.1	106.133	120.253	116.582	112.593	119.718	121.025	123.736	114.395	35.0288	41.0702	34.0219	36.0353	34.8694	33.5428	33.0328	36.1831
11.2	103.209	105.026	118.152	93.0911	107.775	98.3374	103.565	119.043	33.8415	36.3815	32.433	30.0171	32.3186	38.0958	32.0298	35.0545
11.3	102.214	102.783	85.5343	111.367	110.131	128.748	98.4387	104.902	33.1154	35.6252	35.3854	39.2371	32.534	35.3296	33.4401	37.4067
11.4	101.277	120.448	100.119	104.668	108.665	103.545	95.8514	103.636	32.5731	34.9998	31.9389	32.364	32.872	33.3948	32.1945	33.2725
11.5	99.3678	87.1275	100.953	91.0195	113.618	81.2051	92.7032	103.866	32.0846	35.2464	34.8733	30.623	29.2315	35.1497	34.8954	36.8096
11.6	95.5904	94.8361	89.2217	117.169	78.9804	70.3682	100.638	89.8314	31.5678	30.8432	26.3923	30.3289	34.7138	30.0952	33.5897	30.9664
11.7	92.2722	100.116	94.9717	86.0263	78.0958	101.933	99.4717	91.1741	30.3639	26.8791	30.6227	21.2817	29.7964	25.4132	34.0258	32.7244
11.8	91.9155	80.1126	75.0891	84.2838	91.4127	94.5995	89.2547	95.7986	29.9762	34.5356	27.1317	35.2142	32.7706	29.2671	33.3804	26.66
11.9	92.0928	108.048	91.185	104.44	95.8803	97.1405	98.3894	97.0405	29.3867	27.5982	27.8322	26.2818	32.9809	28.626	30.4226	27.7106
12	91.892	106.549	94.059	99.7102	90.9025	107.772	84.4334	111.751	28.5438	29.3146	23.0855	28.3479	24.6381	34.2162	31.1451	28.8456
12.1	90.5892	75.0357	91.9818	83.1857	99.7276	83.4947	85.7389	70.0486	27.5867	25.252	29.086	28.1379	28.3151	31.0967	29.6074	28.3832
12.2	88.4566	62.7276	71.6438	96.5282	96.7977	92.9727	78.1923	87.9501	27.6906	25.0321	27.3508	27.9491	24.561	34.3686	31.8895	29.3579
12.3	85.2876	73.4323	100.674	94.2669	83.0261	85.5627	87.4203	64.3914	27.1356	26.5598	24.5525	27.3459	27.835	23.766	28.0424	26.7143
12.4	83.4095	76.5835	73.3842	80.596	101.403	89.8238	77.6925	89.1406	26.0029	23.7656	24.9274	30.9114	27.4501	22.5303	27.2667	21.9795
12.5	82.7078	91.8847	83.2996	76.287	89.6376	86.6131	91.5925	89.0118	25.2035	24.0161	24.9675	28.545	21.9594	21.6823	23.7326	27.8206
12.6	82.7596	77.4441	95.8428	84.722	103.369	75.9152	99.9997	84.7251	25.0244	17.9371	23.8954	26.4051	28.0279	23.8653	23.9948	27.9119
12.7	82.253	77.4769	79.0911	86.4397	87.4136	76.5904	82.0126	103.398	25.1402	24.1635	25.6189	26.2696	23.8585	25.2268	18.8845	23.4854
12.8	79.6693	83.8406	80.0326	80.8168	85.5347	69.891	77.2087	63.7171	24.6827	22.2581	24.8282	25.7857	23.8372	25.1034	22.3064	24.1727
12.9	78.7097	84.8226	74.1459	93.5763	67.1322	64.8784	80.8297	88.5997	24.3569	24.7392	22.9282	24.903	26.0974	19.3638	27.18	23.5378
13	78.2182	73.911	88.3428	77.8567	76.5978	86.5123	84.341	63.4219	23.874	26.7323	20.5993	22.1803	23.1851	22.0029	28.016	21.8285
13.1	77.3813	90.1964	71.5724	81.0566	81.9687	79.8018	72.2713	71.1447	23.3706	23.8482	20.5611	22.4458	24.1125	22.5926	23.1523	22.1335
13.2	75.6206	86.2625	80.5535	72.2575	82.6234	49.7716	86.0451	59.8337	22.9961	23.7356	27.0317	23.0384	23.5141	24.5891	20.0771	26.9112
13.3	75.031	64.9498	63.374	85.4827	70.8199	78.1508	74.6085	79.3261	22.4722	26.1393	20.8249	26.5578	24.2141	23.715	22.9981	21.9137
13.4	74.3749	62.9242	83.2666	69.9681	60.4824	70.554	87.7692	81.9631	22.2916	22.6045	17.9067	19.8012	21.8774	22.9827	22.1655	25.0089
13.5	73.883	70.7865	71.0314	92.2953	77.2692	77.6957	83.0174	76.0001	22.0307	22.347	18.0255	23.7043	21.8226	22.9551	20.1275	24.8494
13.6	72.6541	70.9422	72.0298	72.3295	78.9979	73.1069	79.0416	71.9503	21.6701	22.9346	21.3894	22.9266	20.1382	23.5241	25.2445	23.9901
13.7	70.6933	53.7422	78.4667	73.6326	79.1596	46.1238	88.4094	69.5091	21.1551	21.9196	18.4194	22.3659	22.1083	17.1994	18.6973	20.5561
13.8	68.7231	60.1473	73.7766	60.0359	63.5791	84.5077	67.1506	70.5163	20.3015	17.8461	21.0912	20.8121	19.9071	18.7672	22.4306	23.6623
13.9	68.6723	72.757	69.9118	71.6798	88.478	68.1974	70.3295	77.3304	20.3543	19.1083	21.3541	19.6256	20.0706	21.8598	16.468	23.0376
14	67.5938	77.222	72.7747	58.3226	80.8429	58.2955	70.0485	61.4756	20.4825	19.6397	20.2997	20.4056	16.9366	23.5445	20.5672	21.3899
14.1	66.0359	68.6411	68.5824	69.3793	78.8234	69.6298	64.1011	73.6756	20.4964	18.4034	21.4669	19.9479	22.232	16.1364	20.2933	19.2609
14.2	64.8977	55.3374	69.5501	70.3582	62.5803	75.6113	63.7291	65.8756	20.3083	21.2629	18.8713	18.862	20.0836	18.4874	22.0183	19.5585
14.3	64.9191	65.0405	56.3788	53.7007	77.3408	58.321	57.1959	48.1436	19.9078	19.1616	17.8403	16.6603	17.4443	20.1256	22.5528	20.5313
14.4	65.877	55.4176	78.8575	73.8598	60.437	83.683	73.638	63.3091	19.7205	20.6196	18.8151	18.3507	17.444	16.2658	18.9515	20.0322
14.5	64.6885	82.4722	53.9018	51.9159	72.6263	83.6274	75.4341	69.0659	19.6816	18.8629	17.8203	20.8788	17.0893	21.209	17.7091	18.2007
14.6	63.1317	69.597	68.8812	65.2619	63.9211	62.6575	57.4198	61.0053	18.9974	18.0449	20.8503	19.977	20.8562	19.9894	16.9007	18.369
14.7	61.0235	60.3034	53.7842	52.9421	62.3408	71.2169	67.7482	49.523	18.5	20.9616	16.286	20.1534	20.152	21.8848	17.7421	19.8178
14.8	58.9804	65.6389	52.0267	57.3906	62.8735	52.1268	59.7262	49.5387	18.2999	17.1696	15.4908	14.8595	19.6042	14.8538	17.6186	19.1002
14.9	58.425	60.667	47.2565	61.5132	58.2873	62.2985	59.9948	67.989	18.0171	18.7837	18.4176	20.3213	16.3013	16.7974	16.625	19.5129
15	57.2076	54.2598	58.0472	60.9373	57.543	57.4863	52.3885	52.6569	17.7619	18.5633	19.864	15.6694	20.7232	20.4674	19.0685	20.9267
15.1	56.9322	68.8851	48.4343	52.1984	52.0241	63.0462	54.9171	65.4566	17.3359	16.4267	16.0612	18.5866	15.5154	18.6491	19.7118	18.5411
15.2	56.4514	58.3414	50.7926	70.983	48.4064	58.5502	60.7447	59.2546	17.2537	15.5493	15.7926	19.4098	18.5984	17.1864	16.5327	13.7585
15.3	55.6099	54.7436	55.9023	54.629	62.0421	70.3612	51.8897	46.469	17.238	20.5329	15.0308	17.5646	18.9746	15.0748	17.5564	18.8548
15.4	54.4289	71.2782	49.1797	65.1347	65.3867	50.8132	58.1452	65.0647	17.0412	21.9293	14.1977	18.8454	16.7467	18.3566	17.7932	15.7918
15.5	53.4908	52.184	49.757	46.9772	49.3231	45.6344	53.7095	48.5484	16.7043	13.6008	17.712	17.2024	17.7712	18.4718	17.3184	16.9517
15.6	52.7633	42.912	54.8583	58.0408	40.1397	55.1316	60.5364	45.1043	16.7104	15.5202	18.6934	19.1105	16.3125	16.7872	15.1987	18.6701
15.7	52.3351	54.9666	47.9075	51.9849	55.8415	52.8124	55.7186	46.5531	16.4526	19.6463	15.0075	15.8306	16.8333	17.5162	16.0977	15.0163
15.8	52.0009	43.1792	51.3068	46.3604	47.4111	59.7143	58.8108	55.802	16.45	17.6363	14.9428	18.6797	18.375	16.6709	16.581	17.3615
15.9	51.3843	49.4333	58.8644	52.2582	65.6856	53.8096	52.5685	49.4783	16.5953	16.6452	13.0234	18.0498	14.004	19.0903	16.0475	16.244
16	49.7855	48.8746	54.0159	55.501	45.0898	41.8323	38.8155	52.8203	16.3793	15.9075	18.7027	12.3044	18.4708	16.9329	14.4022	14.618
16.1	48.1829	35.735	50.4296	62.5972	48.1478	53.031	48.656	47.6111	16.0437	14.5268	14.1933	17.8684	16.5869	14.5389	16.3912	14.398
16.2	47.2621	45.6159	48.7786	49.0866	43.4731	52.8885	46.2699	42.976	15.8655	17.5494	16.7095	16.4393	18.6597	15.865	13.9904	16.5786
16.3	47.017	41.9479	47.176	46.9656	53.1437	49.6953	46.8758	51.6309	15.7166	14.1218	15.1485	16.3711	15.6319	14.1728	17.4798	19.3629
16.4	46.5319	49.6466	46.5897	39.2068	40.5845	44.8276	43.1285	45.4879	15.5651	14.158	13.1542	15.9667	17.2833	16.3048	15.5614	14.6479
16.5	45.3244	48.2053	44.9409	47.9704	45.6751	34.58	40.2154	44.5407	15.4048	16.6907	16.8124	13.0236	17.8539	16.2891	17.5608	13.3373
16.6	44.5458	47.7527	52.7284	51.0607	43.4048	52.5145	45.3405	42.7439	15.3255	15.0972	16.0961	18.0785	16.4076	14.9536	13.7526	17.2106
16.7	44.3128	42.7044	42.2486	45.219	45.1666	44.329	46.6362	50.6441	15.5434	18.0746	15.1014	18.0157	16.5987	15.3305	14.7361	15.0135
16.8	43.5359	35.7783	30.1934	48.417	36.3949	42.3616	37.4228	34.1218	15.4342	15.5533	14.5177	15.1785	15.5554	12.1486	16.1413	13.922
16.9	42.4896	46.3603	39.5501	29.2785	39.7044	44.4873	34.949	43.4245	15.3363	12.7485	12.5851	13.2576	14.2489	18.3319	14.5298	15.6089
17	41.6506	44.546	42.2483	36.7872	47.6312	40.8583	41.5142	36.9861	15.2265	15.4261	15.1086	13.4065	17.4358	17.9783	12.6644	13.6673
17.1	41.7102	37.2816	40.8446	50.2777	34.8436	33.634	49.0738	40.6625	14.9316	13.4914	15.6871	13.8442	18.1644	16.7093	15.249	16.4651
17.2	40.0085	45.0011	37.101	48.7752	43.2633	37.6661	50.3658	37.1005	14.9153	14.0741	13.6978	15.0318	16.2004	15.1227	12.5631	13.7178
17.3	39.3629	40.7766	45.5117	46.7387	39.514	35.8041	41.5356	36.1617	14.4541	14.3448	17.3053	12.4508	15.1849	16.6065	17.7373	13.8696
17.4	39.2878	39.9315	37.5655	40.1585	32.9367	34.7071	44.9472	36.1909	14.2385	15.0497	14.5168	14.0977	14.8592	10.6329	15.2096	14.4181
17.5	39.2575	41.7857	44.8433	42.6445	43.9498	35.6924	32.5595	46.3302	14.2775	17.1999	13.3139	13.702	17.121	13.0895	13.4921	14.0676
17.6	38.9382	37.7662	45.1443	41.5373	41.0684	49.0544	35.9313	43.2736	14.5098	14.8113	12.6342	13.7376	13.6285	14.3977	15.1276	15.1166
17.7	38.3675	39.6042	45.4048	40.7057	40.8459	43.3055	36.6873	34.5037	14.6892	16.2521	15.0602	16.723	15.3417	16.307	15.3745	16.6667
17.8	37.2872	28.4888	46.4876	32.3509	36.2972	36.0486	38.6627	40.9372	14.488	14.3462	17.7804	15.7761	15.3193	12.6389	12.6215	14.9121
17.9	36.5302	33.9742	35.7976	37.7689	35.4401	43.5762	38.6825	39.7517	14.2511	13.3759	14.452	16.515	15.2421	12.625	14.0921	13.1039
18	36.0098	41.0806	36.792	30.4059	37.7369	33.1952	33.7255	38.5436	14.1307	13.5462	13.4557	12.3571	13.9503	13.3385	9.99117	17.0317
18.1	35.7425	35.8337	37.0671	43.0434	36.7751	46.9013	38.168	28.1904	14.1585	13.6257	14.1851	12.4996	16.5594	16.8448	14.3803	15.6076
18.2	35.7164	37.35	41.2442	38.6016	35.123	30.4691	34.8205	32.0711	14.3162	12.4025	13.7266	14.505	13.6654	14.0031	14.1853	14.2004
18.3	34.4938	36.9301	41.406	36.1275	29.5437	36.3341	39.447	31.9698	14.1993	12.6933	13.1812	12.3753	15.5877	11.2094	15.8373	16.1678
18.4	34.0237	34.0837	30.8191	36.6706	33.5299	35.7366	30.4002	32.2377	13.9518	10.32	13.4477	13.8623	12.5418	13.233	16.0867	14.8795
18.5	34.0126	32.4909	41.0612	32.3815	34.9296	37.819	28.2235	26.8258	13.7044	11.515	13.2562	13.4118	14.3844	12.9708	14.4054	16.3564
18.6	33.7365	38.8479	31.5024	44.0931	31.4522	34.4836	39.9796	41.8579	13.4484	13.3837	13.2021	12.9687	15.0361	12.6047	13.5092	13.5172
18.7	32.9725	37.7536	37.0244	35.3169	36.0522	30.7916	29.7351	32.9591	13.2546	11.4354	13.6827	13.1737	13.9176	12.5473	14.8727	12.0925
18.8	32.5477	30.7776	35.2676	36.2789	32.893	38.3186	28.0886	31.7914	13.4754	11.1204	14.0613	14.1161	12.4034	14.0473	15.1996	10.4882
18.9	32.3129	25.0753	31.9923	31.8408	38.1814	34.7589	28.3416	39.5023	13.4917	10.1279	12.1889	15.6898	12.7068	11.908	13.2247	16.2817
19	31.865	34.0909	30.999	28.1963	30.4418	36.0282	39.0713	37.7661	13.1271	11.747	15.0928	15.5657	12.9913	11.5006	15.8783	15.2201
19.1	31.4055	27.1861	31.9365	24.7409	32.6234	30.8493	29.6492	25.3956	12.8631	11.8181	12.8	12.6568	13.2887	14.7295	13.9943	11.4773
19.2	30.9319	28.9546	26.5894	20.2706	30.8298	37.5102	37.0982	29.2353	12.705	13.1028	13.5779	14.5682	11.2927	12.6595	12.0298	10.713
19.3	30.394	32.1038	26.7526	31.4947	33.1881	34.869	30.0287	29.6512	12.5422	15.6922	10.2343	12.5017	13.3456	12.6966	12.4003	10.9127
19.4	29.9722	26.9982	29.1577	31.2935	33.2581	27.0835	35.3409	28.9971	12.3481	11.4136	9.64393	13.8231	13.5315	12.4118	12.6309	13.6746
19.5	29.3994	26.7633	20.8468	32.5182	31.9989	28.4069	29.6357	31.2196	11.9468	13.0268	11.5914	13.5142	12.3301	12.1787	10.4295	12.2896
19.6	28.8193	26.9896	31.5661	24.4815	29.8345	24.1278	30.4323	28.696	11.8252	11.0704	10.861	10.5643	14.3378	13.3995	14.0961	10.3791
19.7	28.4133	32.3846	25.9086	25.6507	29.0972	32.3297	24.9498	28.6236	11.7644	10.2426	10.9459	10.6842	13.2226	11.2982	13.0212	12.4751
19.8	28.2212	30.5684	28.8187	26.9782	25.4185	28.5129	24.5903	18.3279	11.6068	9.8896	13.0683	12.9374	10.477	12.7757	11.9969	11.3427
19.9	28.0011	31.0385	20.0613	24.6083	30.0816	34.9146	28.071	25.5549	11.1343	10.3336	13.4166	11.1351	12.0051	10.2537	10.266	12.339
20	27.6702	32.2354	25.5253	25.0165	26.0673	24.5048	28.0775	33.0648	10.8975	10.445	10.9346	11.0189	10.7023	11.3289	11.6526	11.6981
20.1	27.2114	26.3874	26.2585	22.107	30.0951	26.9572	26.6221	37.6381	10.9301	10.6195	12.236	11.9079	9.42953	11.3143	8.76786	10.9814
20.2	27.2467	24.7886	25.8526	31.0016	27.617	22.5441	30.2522	25.0621	10.9338	9.8974	10.0216	11.7692	9.24694	10.242	11.5859	10.2403
20.3	27.4461	31.0033	25.9728	31.6651	27.6696	30.2547	29.0426	24.6586	10.8817	11.6915	11.3404	11.172	10.5127	11.2844	10.7471	11.3799
20.4	27.277	30.6483	26.1812	25.9557	24.1506	28.6635	34.0281	23.7827	10.7888	10.5918	9.72074	10.751	9.91381	9.58686	11.0678	11.0183
20.5	26.5614	31.0627	26.3076	28.0033	23.1752	27.9266	25.9649	29.7033	10.6199	10.162	11.0532	11.2048	11.0922	9.74303	10.7785	11.0066
20.6	26.5813	34.8413	28.4301	27.6205	27.2013	25.4547	27.6609	25.639	10.435	8.25778	10.6025	12.7438	10.0593	9.67527	10.8246	10.761
20.7	26.6758	30.8935	23.4537	30.3246	30.892	26.2978	19.8835	24.7301	10.4105	9.10102	11.1719	11.0252	10.2625	10.7631	11.4822	11.3187
20.8	26.6137	26.5407	23.4223	25.0016	29.2983	28.3598	25.8506	25.4422	10.3931	11.2455	10.3259	10.4689	10.4692	10.237	11.6317	10.3061
20.9	26.2497	23.3441	31.338	25.2344	30.0837	31.0418	29.3943	24.8901	10.3317	9.92508	10.5163	11.6016	10.9548	9.45292	12.8993	10.6052
21	25.3819	25.3082	22.6294	26.3698	21.7907	28.9993	23.9667	25.9946	10.2742	10.1183	10.8222	11.1367	11.5258	11.3606	11.1703	9.9505
21.1	25.1628	24.3811	26.9344	23.7288	27.7937	21.0986	25.5444	31.0175	10.1631	10.5012	11.1115	9.93678	11.2457	11.6394	9.23187	9.31256
21.2	25.0554	23.0177	26.6006	25.5954	26.1096	26.5262	26.9638	28.3919	9.98012	10.2871	9.4566	11.3296	10.4033	10.0195	8.54707	8.66692
21.3	25.0763	24.3503	27.1001	30.7933	24.6772	22.1438	28.4076	24.714	9.84004	7.74155	10.8365	9.68441	13.0313	12.111	9.66149	9.7354
21.4	25.0558	27.6037	23.4462	24.7836	26.0539	25.6285	27.1889	23.7464	9.73898	11.3977	8.14371	7.99923	9.13318	10.3065	10.2229	10.7808
21.5	24.8185	24.0455	27.0188	26.6512	22.0325	28.0528	23.2223	27.225	9.65783	7.42094	10.4865	8.85797	7.70841	9.79793	10.4239	9.53995
21.6	24.5597	29.9771	23.9011	23.5302	24.5025	23.6662	26.9173	19.7962	9.65083	9.49703	9.29319	8.34985	8.9611	10.1539	9.96128	9.81302
21.7	24.4916	21.3534	27.2846	29.5191	24.1846	23.9955	24.6975	27.9064	9.64978	9.47463	7.54896	9.822	11.0286	8.22727	9.08437	9.96736
21.8	24.3175	25.0131	27.1632	25.7798	24.8707	27.2387	16.4292	26.2956	9.61828	9.18716	8.95245	7.72451	9.71777	11.5824	9.88505	9.59685
21.9	24.2282	18.9059	25.7145	28.222	23.8286	26.9986	28.9158	28.0512	9.59839	9.58774	8.81803	10.3886	9.81508	9.6153	8.6622	10.8495
22	24.2272	26.3848	24.4466	19.5699	23.5119	21.7757	30.5388	23.7159	9.59775	9.06707	10.5593	9.12019	8.8472	8.8686	7.89792	10.0503
22.1	24.0967	25.6914	24.2228	28.9982	22.2963	24.6595	21.9498	20.2798	9.58972	8.41168	7.59929	9.50719	9.44557	9.27643	8.58992	8.46558
22.2	23.6294	23.5244	22.4121	21.666	19.6418	23.3938	19.3627	25.7846	9.33237	8.81858	9.62761	8.50623	9.50135	10.5486	9.8794	8.94749
22.3	23.4953	19.3858	22.6235	21.3746	24.3952	27.2746	18.2084	23.8196	9.25256	9.02988	9.25985	8.95129	9.10051	9.4488	8.33345	8.31261
22.4	23.7011	25.6105	24.3075	21.5624	22.7937	21.4371	26.7614	23.7618	9.23097	7.75376	8.1073	9.37816	8.40684	9.70508	9.26301	7.41385
22.5	23.8642	23.6905	21.8356	19.5294	18.7006	19.3277	24.6292	25.3211	9.2966	10.0504	8.37265	9.68723	8.50035	9.3874	8.12105	7.62962
22.6	23.5782	26.1106	22.2114	23.9935	28.1398	26.1157	22.8184	21.0567	9.45307	9.33611	9.07714	8.3338	9.07504	9.70763	9.41063	9.62559
22.7	22.4086	20.4748	21.8409	19.754	22.0557	22.6153	21.804	20.6607	9.38825	10.4883	8.28403	9.84598	10.4978	9.83974	9.19811	8.89227
22.8	21.9786	23.1442	19.1028	25.6998	21.7186	22.0283	23.8465	22.5937	9.30016	7.97677	8.39793	8.93043	10.4512	9.65335	8.39987	9.01157
22.9	21.3773	22.1139	19.8062	22.3047	18.4433	21.6558	21.2921	20.8434	9.16669	8.51605	10.064	7.90925	10.6414	9.9259	10.1666	8.74233
23	21.0113	16.2665	19.6278	21.2454	21.4144	18.4202	24.2026	18.8274	9.05105	7.7539	8.57617	9.49786	10.2241	8.04896	8.72023	8.91411
23.1	20.8824	21.9529	19.263	25.3311	17.8912	23.1856	23.3897	19.2019	8.96488	9.49501	8.31583	8.78971	8.55971	8.25724	8.95856	8.77158
23.2	20.6038	19.9856	21.3176	21.2475	20.2717	22.6085	22.5657	16.2806	8.87169	8.22543	9.15517	10.3387	8.9958	9.75542	7.63833	9.01166
23.3	19.9739	15.9891	22.4488	22.6745	17.359	18.9892	17.3237	19.4588	8.87581	7.56492	8.21956	9.93372	9.71903	9.0915	7.51542	8.7016
23.4	20.0703	21.9481	23.2261	23.4317	18.7164	19.5664	16.0159	18.1294	9.02763	9.1861	7.36312	8.22389	8.96979	9.51178	7.04505	8.88127
23.5	19.7547	23.5845	16.8286	18.3502	19.6921	20.4188	17.8355	20.7599	9.05799	9.82757	9.68558	9.58568	8.3334	7.32972	8.70196	9.96527
23.6	19.3882	19.3546	20.6592	19.4031	18.3729	19.1332	19.1826	18.5273	8.97504	9.61276	9.36038	9.31577	8.47592	8.85831	10.473	8.12909
23.7	19.2903	22.9909	20.5887	18.6063	20.9036	18.5175	22.0058	20.1459	8.82431	8.54014	9.99391	7.58289	9.34133	8.17416	7.57543	9.01715
23.8	18.8486	19.8612	15.2955	16.3	16.1481	19.1719	22.7672	23.8954	8.74388	8.00507	7.43316	8.66357	8.66743	9.22333	9.5742	8.69193
23.9	18.2206	19.3156	14.2826	17.034	16.4981	16.8631	17.8529	17.1884	8.80074	8.99808	8.49586	7.38244	8.56958	8.50469	9.64588	9.20776
24	18.1633	19.7934	15.8251	18.6847	22.6839	16.1594	12.6483	17.5399	8.80288	8.95451	9.39402	10.148	9.58414	9.47264	8.85577	9.1447
24.1	18.2275	22.511	15.5381	19.3139	17.2097	17.9957	24.0114	14.94	8.68185	7.52476	8.37848	8.01112	9.01103	9.74992	8.16357	6.60663
24.2	18.2205	19.2431	20.5946	18.4348	18.8941	17.3642	18.809	17.4702	8.51463	9.29242	8.9724	8.87922	8.27623	7.42558	8.95338	7.80427
24.3	17.9824	17.1848	18.7962	17.9193	20.4123	17.8715	14.1564	20.7055	8.51335	8.99904	8.01902	7.99286	8.43422	8.30945	9.46415	8.67205
24.4	17.9786	16.5682	16.6935	20.9439	13.371	24.7481	20.257	18.4602	8.56877	10.1886	8.61102	9.22757	8.0476	8.87992	8.83536	6.94958
24.5	17.833	18.4441	18.9482	19.2138	19.022	18.0247	17.4107	17.5093	8.70628	9.82995	8.36047	7.74662	9.00888	8.78176	9.01594	8.87308
24.6	17.6496	20.0509	18.9068	11.422	19.0388	18.0621	17.61	16.8268	8.72796	9.99116	9.22379	7.81182	9.9172	10.1599	11.4791	7.74738
24.7	17.6031	19.6046	15.9705	18.4629	15.5506	14.6888	16.2792	19.4247	8.65996	6.85687	9.13898	8.18522	10.3257	7.98914	7.19713	8.25184
24.8	17.7299	18.8215	19.2726	18.8281	16.3651	18.6488	19.4328	19.3347	8.55519	9.19777	6.78847	8.57953	6.77758	8.28117	9.96113	8.86373
24.9	17.3213	18.7935	18.0518	19.5456	17.2662	15.4883	16.9823	15.773	8.55956	8.53285	8.57498	8.96411	7.38959	9.06677	6.24472	8.0204
25	16.7381	16.4479	15.1465	16.1196	12.9347	17.1666	16.7406	15.097	8.5869	9.13073	8.60633	7.37996	7.7411	8.7575	8.519	8.08961
							Fig.5J
		SWS-PSD (μV²/Hz)
		mcherry	4Di
		864.373	372.431
		826.657	368.133
		881.202	347.761
		828.879	314.036
		732.379	395.594
		635.401	301.606
		900.751	317.299
		825.451	322.829
		Fig.5K

## Sheet: Fig6.
	SYP			PSD95				SYP			PSD95				Golgi staining
	CLP+DEX	CLP		CLP+DEX	CLP			mCherry	4Di		mCherry	4Di			CLP+DEX	CLP			mcherry	4Di
	1.37833	0.974001		1.26331	0.432721			0.86374	0.736121		1.30887	0.754946			4.53881	3.15322			4.05693	2.72357
	1.00826	0.858575		1.09762	0.55309			1.27999	0.788142		0.918861	0.699479			6.24149	2.90158			4.28062	2.63519
	1.03874	0.602991		1.02218	0.380699			0.793742	0.630004		1.12103	0.64231			5.55556	4.74583			4.06034	2.56282
	1.09614	0.620647		0.535812	0.374532			0.660765	0.497298		1.01281	0.717299			6.66667	3.60312			4.93346	3.45073
	1.52284	0.970245		0.786485	0.342721			0.913558	0.76324		1.12837	0.53451			5.50459	3.85129			5.08102	3.02675
	1.20855	0.802623		0.627118	0.508336			1.00825	0.5207		1.17832	0.63527			5.88235	2.91493			4.93867	2.62502
	Fig.6B							Fig.6E							Fig.6C				Fig.6F

## Sheet: supplementary Fig.1
		The Number of VLPO c-Fos+ cells						Co-labeled EGFP cells (%)
		sham	CLP	CLP+DEX				GABA	GLU
		150	123	149				88	12
		136	135	156				92	8
		148	137	162				91	9
		153	124	158				89	11
		155	133	146				93	7
		155	133	150				96	4
